# Supplementary material for: Identification of a Dual Inhibitor of Secreted Phospholipase A2 (GIIA sPLA2) and SARS-CoV-2 Main Protease
Source: MDPI journal article supplement (doi:10.3390/ph15080961), 2022-08-03

# Identification of a Dual Inhibitor of Secreted Phospholipase A<sub>2</sub> (GIIA sPLA<sub>2</sub>) and SARS-CoV-2 Main Protease

Maria A. Theodoropoulou <sup>1,2</sup>, Giorgos S. Koutoulogenis <sup>1,2</sup>, Linlin Zhang <sup>3</sup>,  
Ifigeneia Akrani <sup>4</sup>, Emmanuel Mikros <sup>4,5</sup>, Rolf Hilgenfeld <sup>3,6</sup> and George Kokotos <sup>1,2,\*</sup>

<sup>1</sup>*Department of Chemistry, National and Kapodistrian University of Athens, Panepistimiopolis,  
15771 Athens, Greece*

<sup>2</sup>*Center of Excellence for Drug Design and Discovery, National and Kapodistrian University of  
Athens, 15771 Athens, Greece*

<sup>3</sup>*Institute of Molecular Medicine, University of Lübeck, Ratzeburger Allee 160, 23562 Lübeck,  
Germany*

<sup>4</sup>*Department of Pharmacy, National and Kapodistrian University of Athens, Panepistimiopolis,  
15771 Athens, Greece*

<sup>5</sup>*Athena Research and Innovation Center in Information Communication & Knowledge  
Technologies, Marousi, 15125, Greece*

<sup>6</sup>*German Center for Infection Research (DZIF), Hamburg – Lübeck – Borstel – Riems Site,  
University of Lübeck, 23562 Lübeck, Germany*

\*To whom correspondence should be addressed. For G.K.: phone: +30 210 7274462; fax: +30  
210 7274761; E-mail: [gkokotos@chem.uoa.gr](mailto:gkokotos@chem.uoa.gr).

## SUPPLEMENTARY MATERIALS

## Contents

|                                                                                                                                                                                                                                                                                                                                                                                                                                                                                  | Page     |
|----------------------------------------------------------------------------------------------------------------------------------------------------------------------------------------------------------------------------------------------------------------------------------------------------------------------------------------------------------------------------------------------------------------------------------------------------------------------------------|----------|
| <b>Table S1.</b> Structural details of structures 1-7 concerning the configuration of 2-carbon and the dihedral angle $C\beta_{C145}-S_{C145}-C2-O2$ related to the covalent bond formatted between Cys145 and 2-oxoamide moiety. Molecular Dynamics RMSDs for the protein and the ligand along with MM-GBSA Binding Energy.                                                                                                                                                     | <b>2</b> |
| <b>Figure S1.</b> Structural details for the $M^{pro}$ -GK241 interactions in structures 1-6 resulted by covalent docking calculations.                                                                                                                                                                                                                                                                                                                                          | <b>3</b> |
| <b>Figure S2.</b> Protein residues Root Mean Square Fluctuation during the 50 nsec MD simulation showing local changes among the protein chain.                                                                                                                                                                                                                                                                                                                                  | <b>4</b> |
| <b>Figure S3.</b> Structures of <b>8d</b> (A) in magenta and <b>8a</b> (B) in blue bound to $M^{pro}$ in comparison with GK241 (C) in green and crystal structure PDB 6Y2F (D) in chaki. The side chain in derivative <b>8d</b> adopts a curved conformation exploring part of S1 and S2 protease cavities. Derivative <b>8a</b> aliphatic chain adopts a very similar structural arrangement to GK241, however the alanine moiety appears to interact weakly with N142 and T26. | <b>5</b> |
| <b><math>^1H</math> NMR and <math>^{13}C</math> NMR spectra of the compounds synthesized.</b>                                                                                                                                                                                                                                                                                                                                                                                    | <b>6</b> |

**Table S1.** Structural details of structures 1-7 concerning the configuration of 2-carbon and the dihedral angle  $C\beta_{C145}-S_{C145}-C2-O2$  related to the covalent bond formatted between Cys145 and 2-oxoamide moiety. Molecular Dynamics RMSDs for the protein and the ligand along with MM-GBSA Binding Energy.

| Structure | Configuration of 2-carbon | MM-GBSA Binding Energy (kcal/mol) | Average Protein RMSD $\pm$ StDev | Average Ligand RMSD $\pm$ StDev | Major Interactions | Dihedral Angle $C\beta-S-C2-O2$ |
|-----------|---------------------------|-----------------------------------|----------------------------------|---------------------------------|--------------------|---------------------------------|
| 1         | <i>R</i>                  | -58.69                            | 2.84 $\pm$ 0.48                  | 3.36 $\pm$ 0.95                 | S144               | -73.68                          |
| 2         | <i>R</i>                  | -56.37                            | 1.77 $\pm$ 0.24                  | 4.63 $\pm$ 0.70                 | E166               | -175.218                        |
| 3         | <i>S</i>                  | -54.51                            | 1.73 $\pm$ 0.28                  | 7.36 $\pm$ 3.73                 | -                  | 86.525                          |
| 4         | <i>S</i>                  | -47.03                            | 2.29 $\pm$ 0.35                  | 5.53 $\pm$ 0.89                 | T26, T24           | -45.037                         |
| 5         | <i>R</i>                  | -46.41                            | 2.00 $\pm$ 0.32                  | 3.97 $\pm$ 1.10                 | H41, E166          | -50.033                         |
| 6         | <i>S</i>                  | -45.17                            | 1.95 $\pm$ 0.31                  | 5.05 $\pm$ 0.95                 | H41, N142, H164    | 134.808                         |
| 7         | <i>S</i>                  | -43.26                            | 1.79 $\pm$ 0.26                  | 3.22 $\pm$ 0.79                 | T26, H41, N142     | -55.195                         |

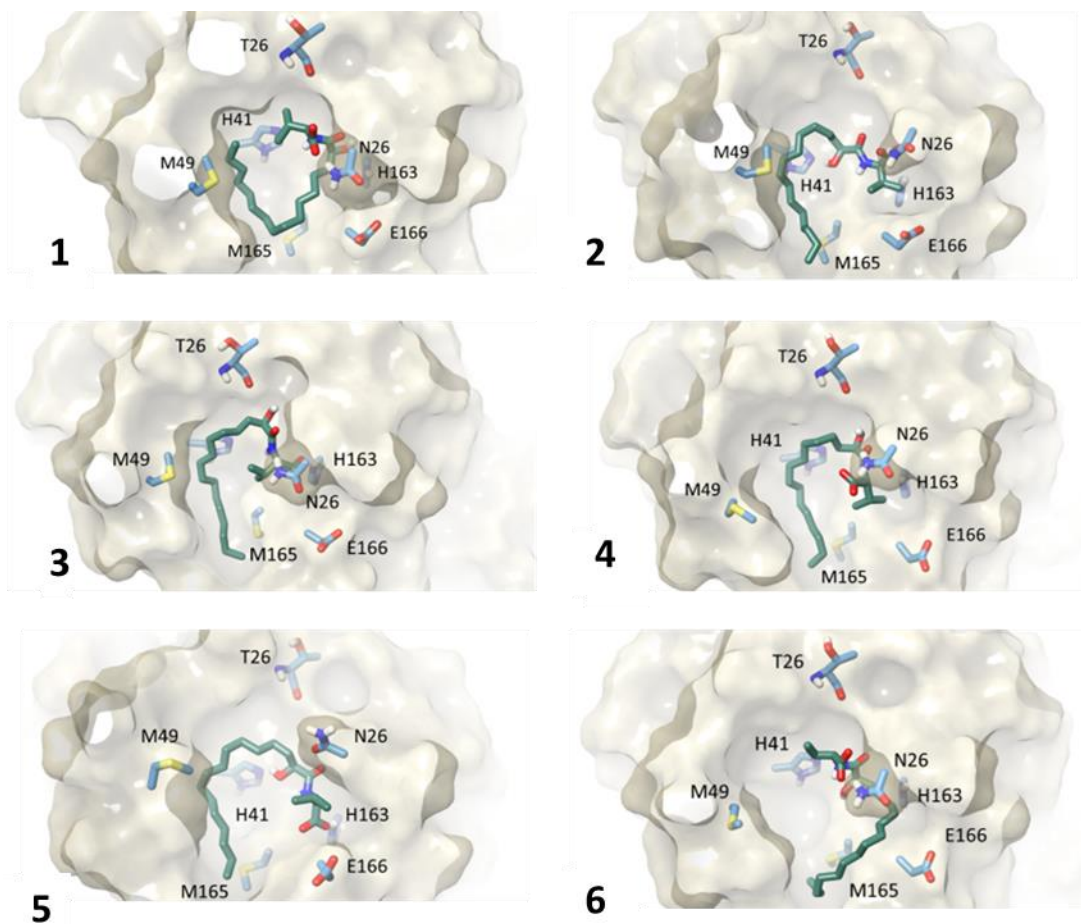

**Figure S1.** Structural details for the  $M^{\text{pro}}$ -GK241 interactions in structures 1-6 resulted by covalent docking calculations.

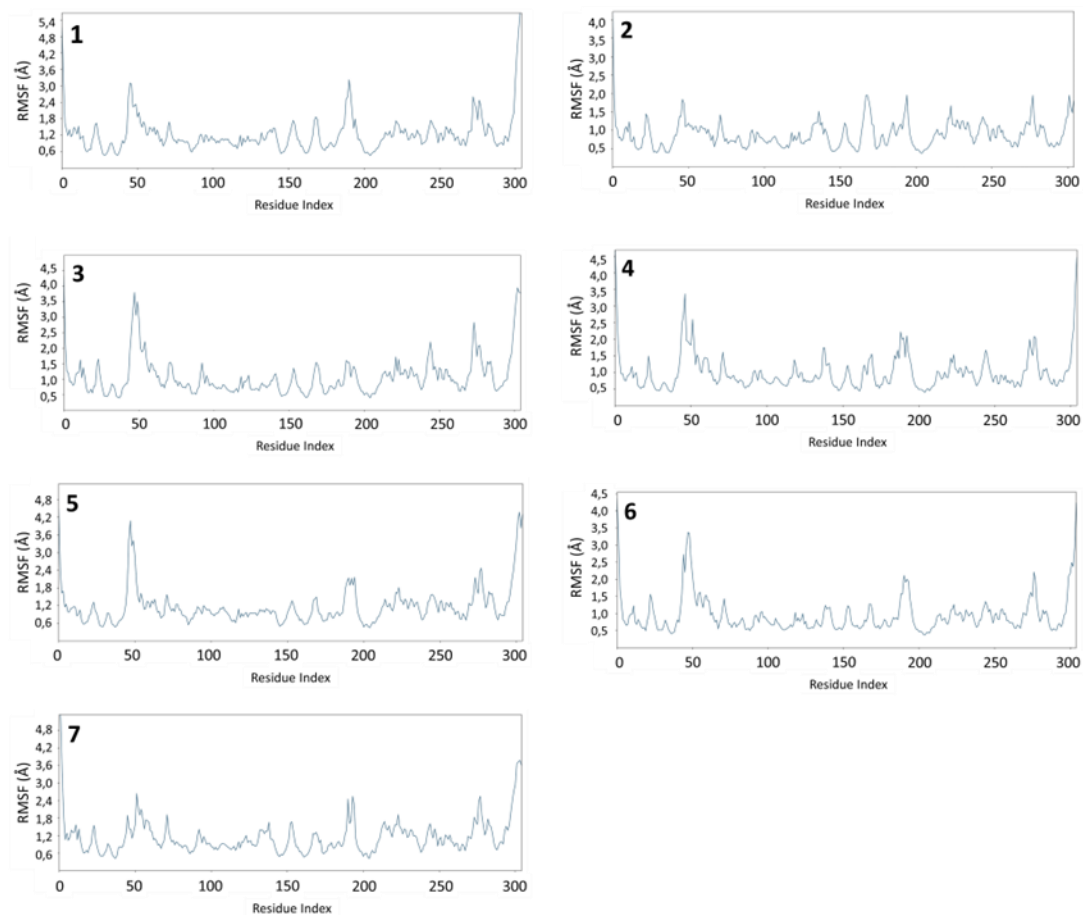

**Figure S2.** Protein residues Root Mean Square Fluctuation during the 50 nsec MD simulation showing local changes among the protein chain.

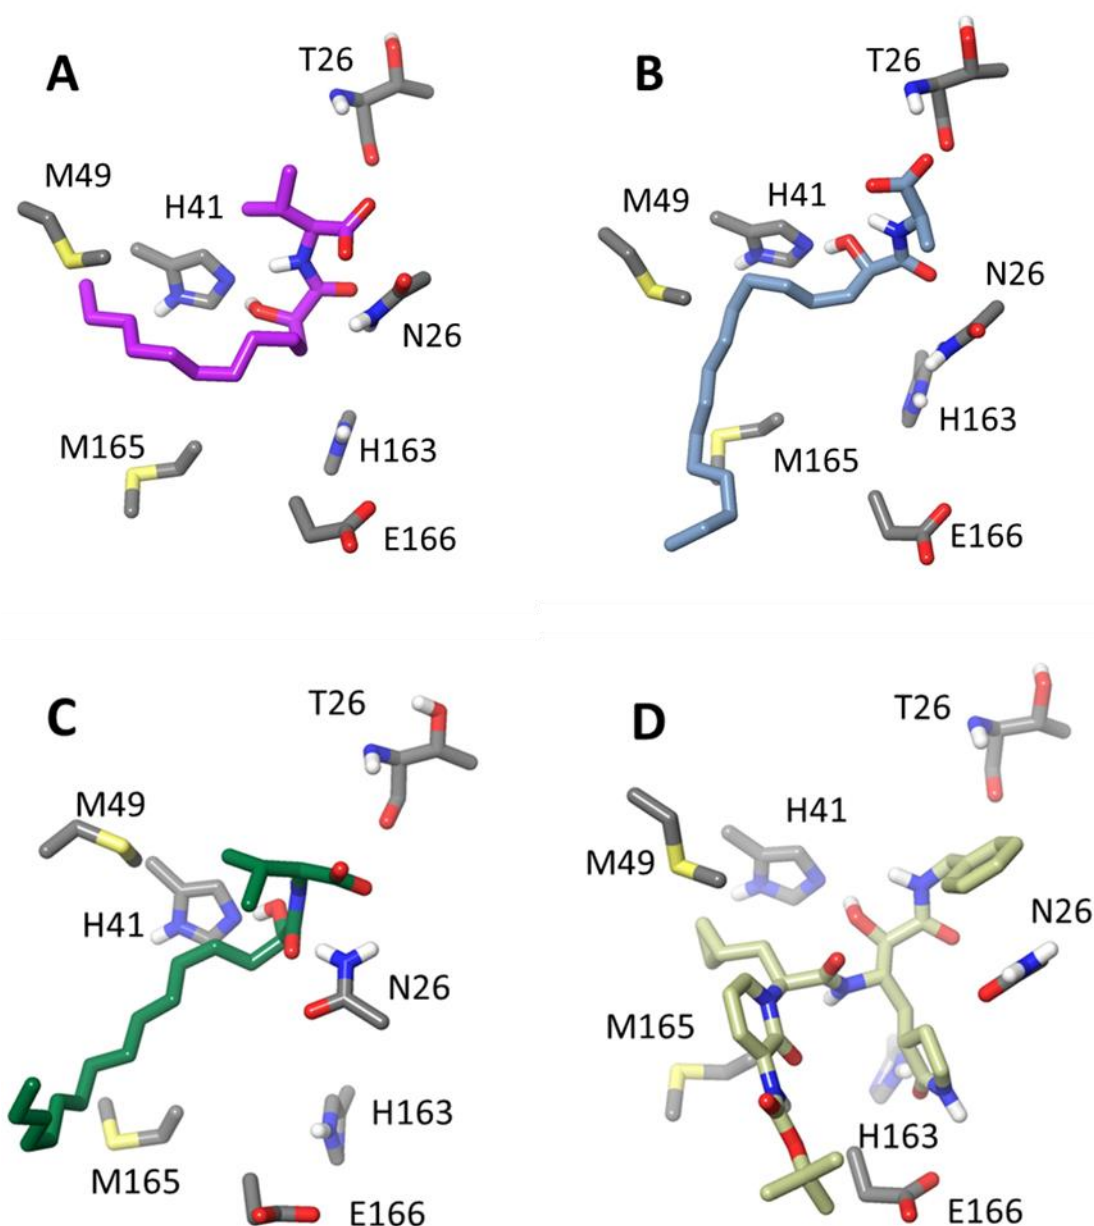

**Figure S3.** Structures of **8d** (A) in magenta and **8a** (B) in blue bound to  $M^{pro}$  in comparison with GK241 (C) in green and crystal structure PDB 6Y2F (D) in chaki. The side chain in derivative **8d** adopts a curved conformation exploring part of S1 and S2 protease cavities. Derivative **8a** aliphatic chain adopts a very similar structural arrangement to GK241, however the alanine moiety appears to interact weakly with N142 and T26.

# NMR Spectra

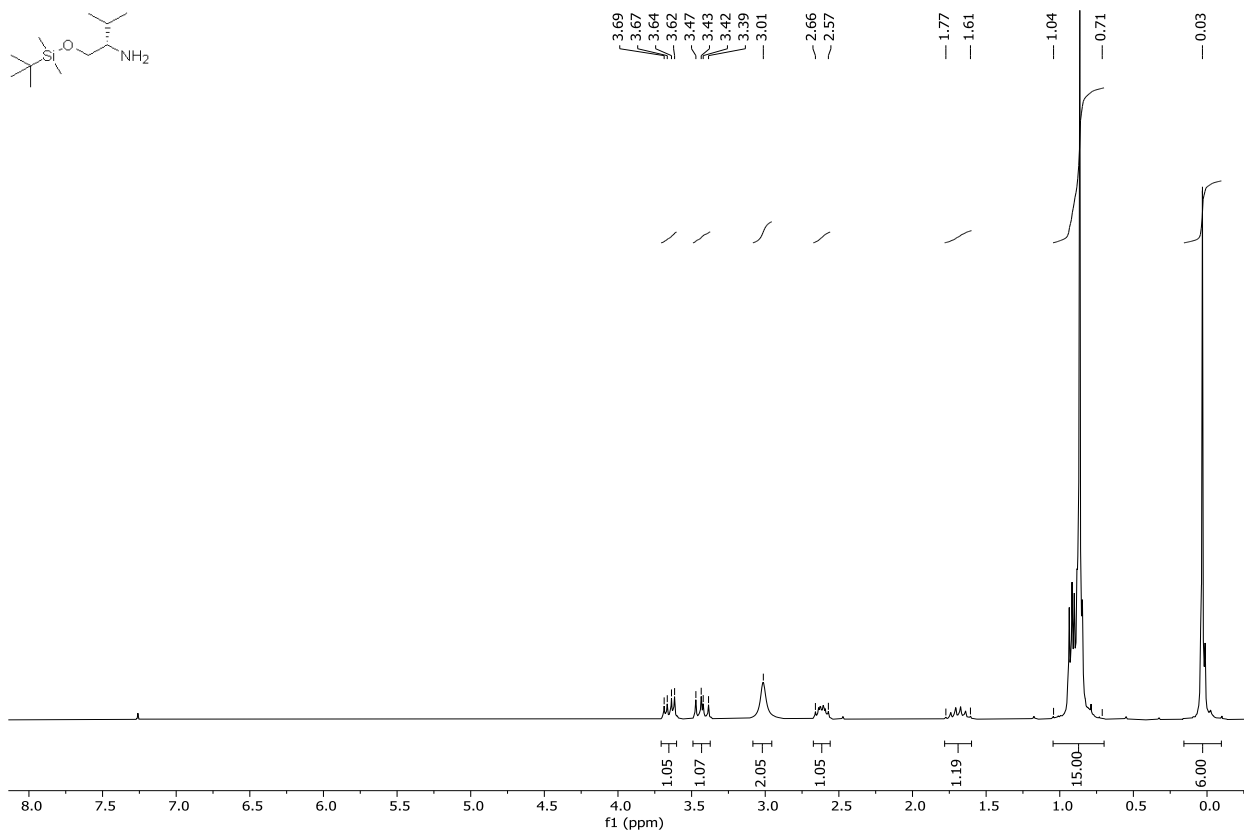

## <sup>1</sup>H NMR spectrum of **5b**.

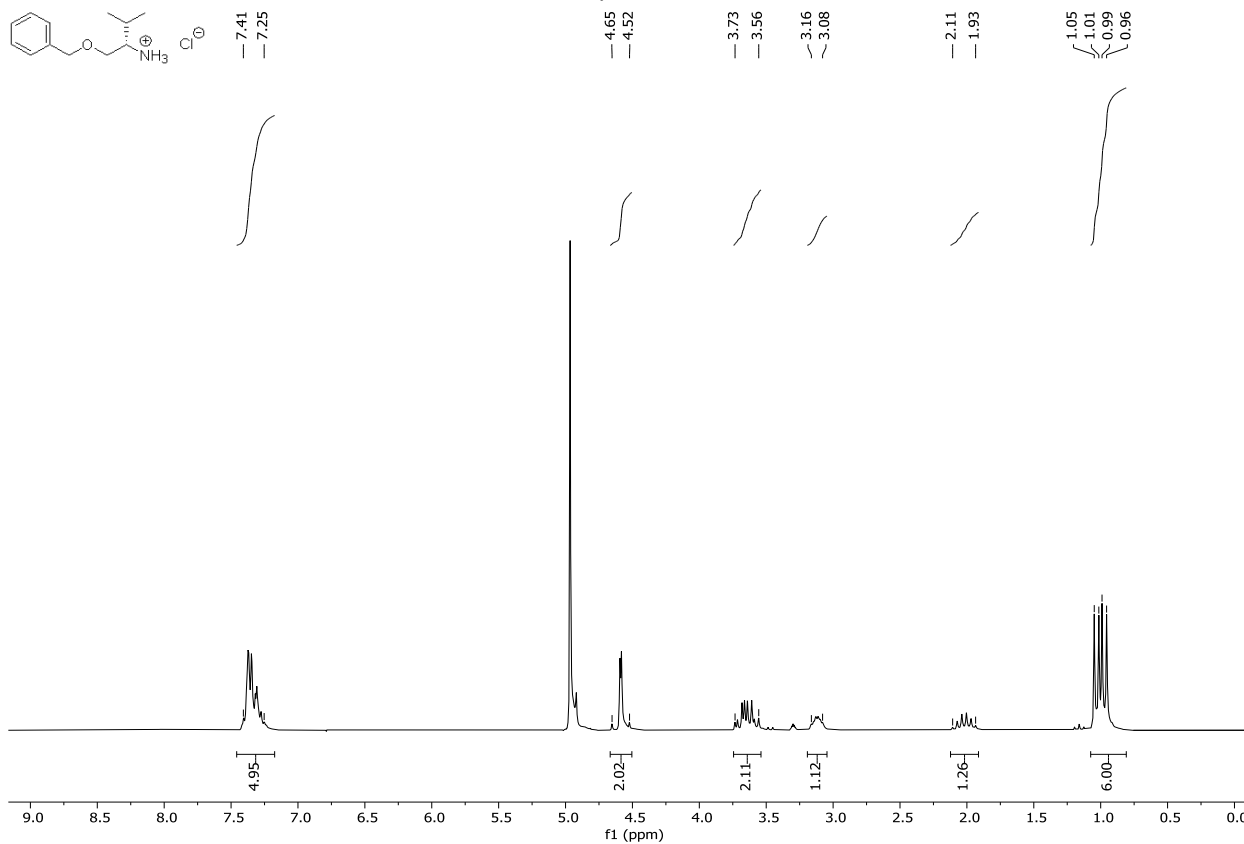

## <sup>1</sup>H NMR spectrum of **5c**.

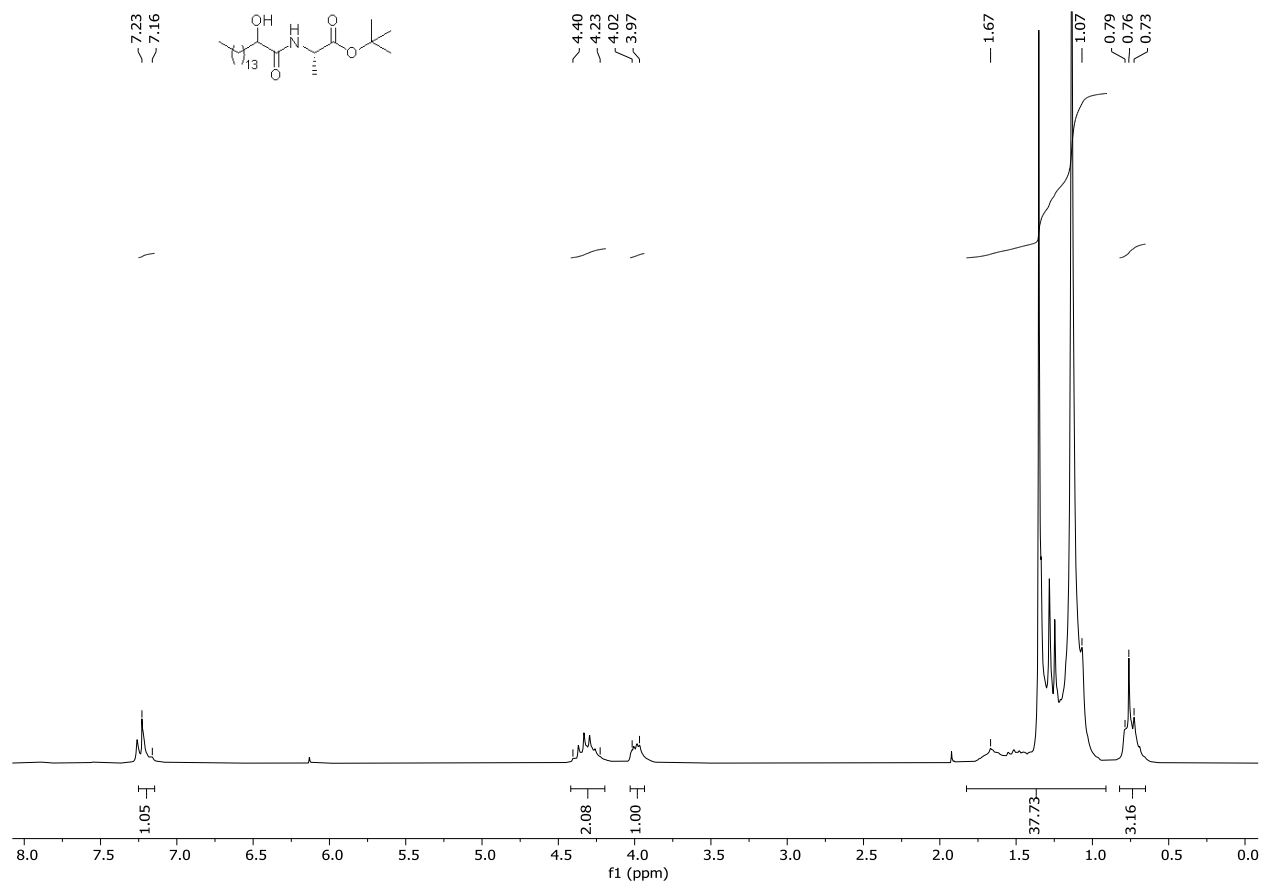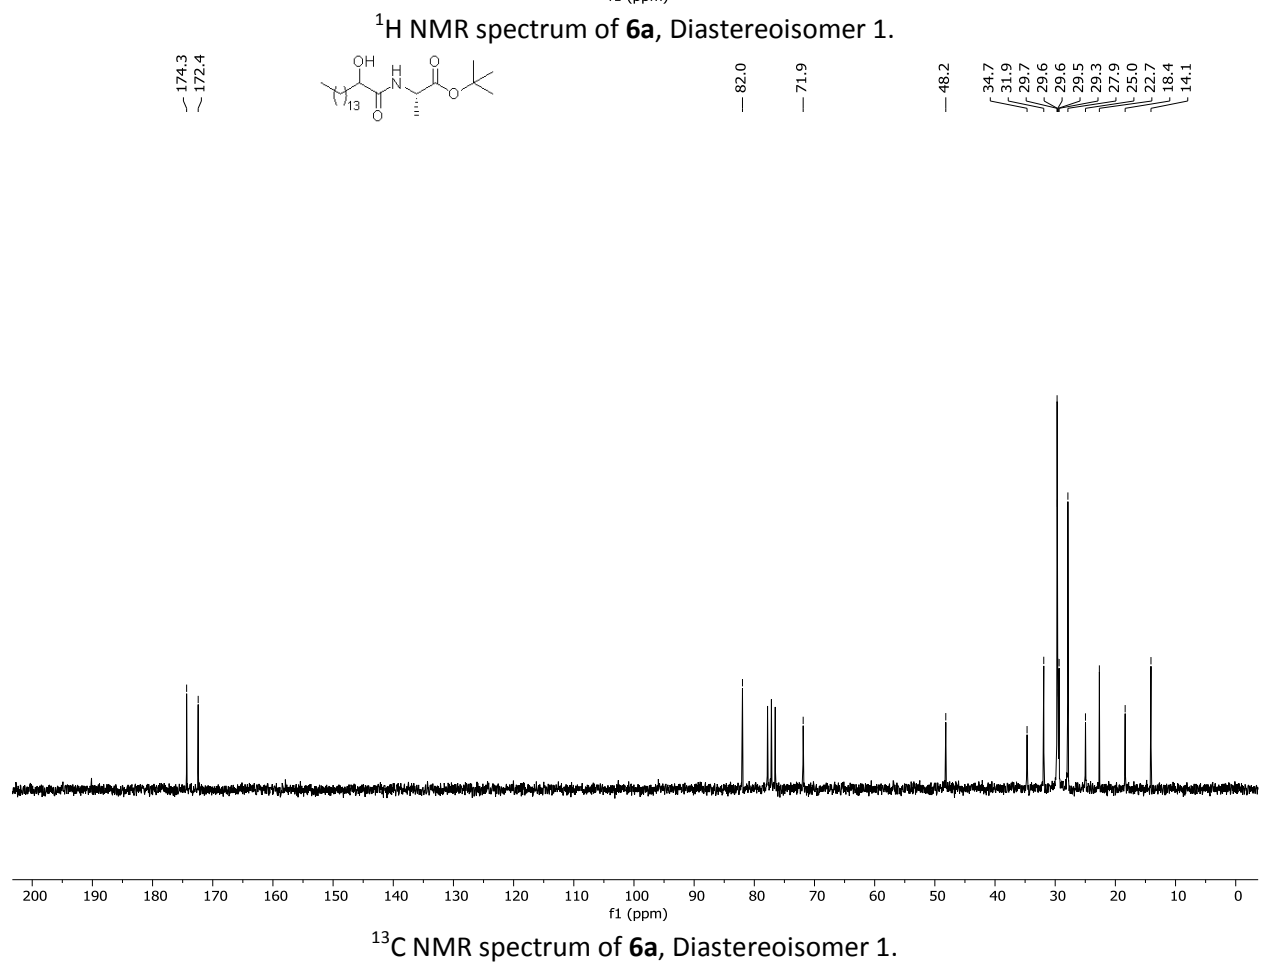



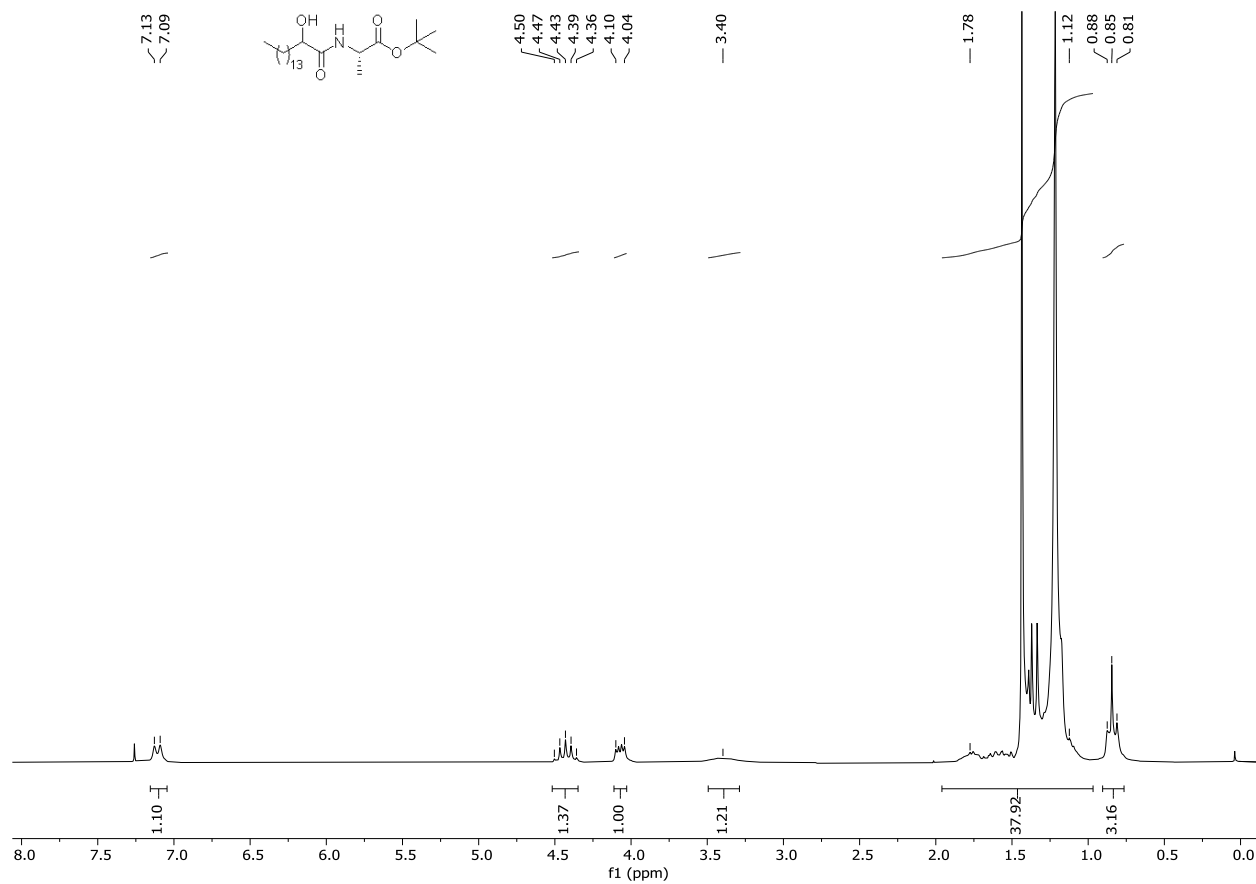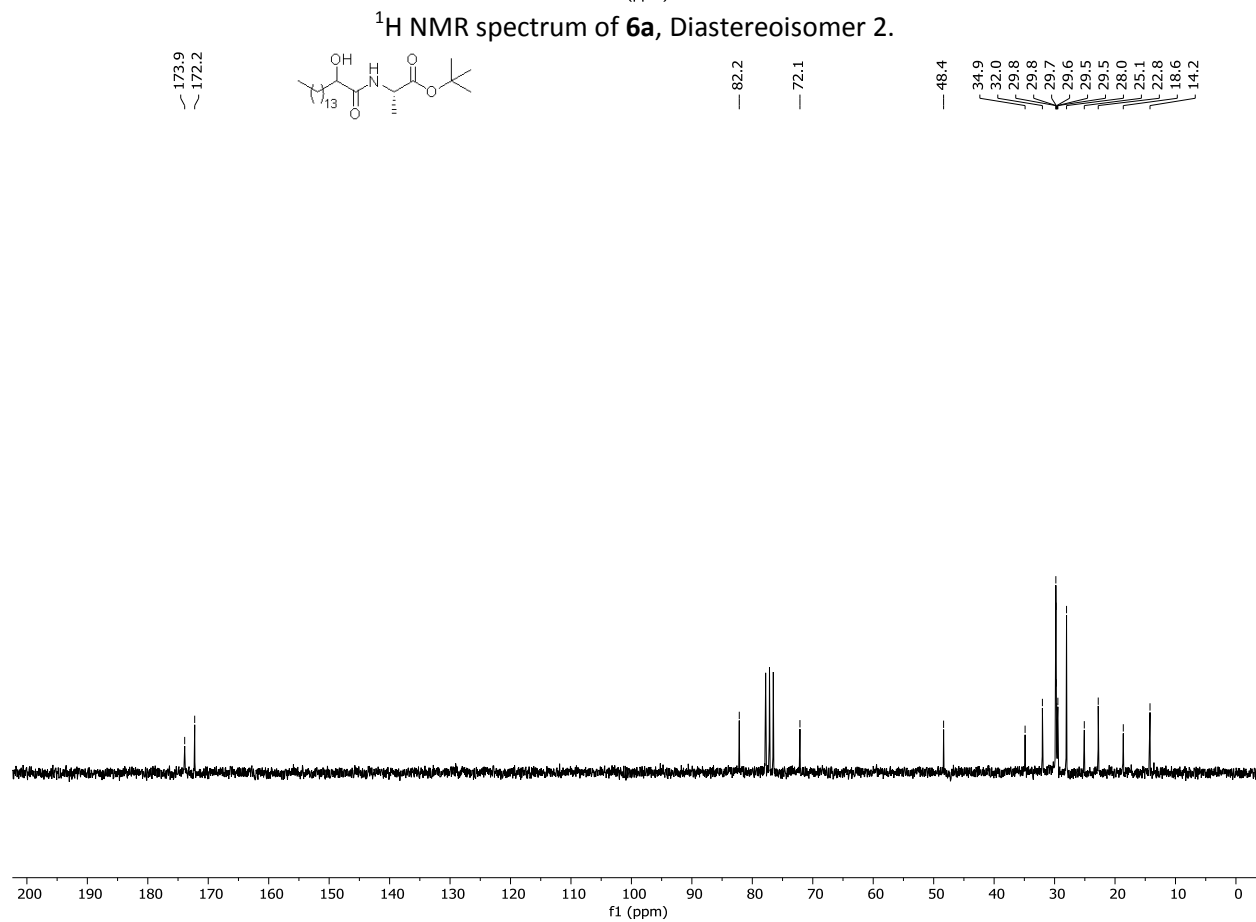



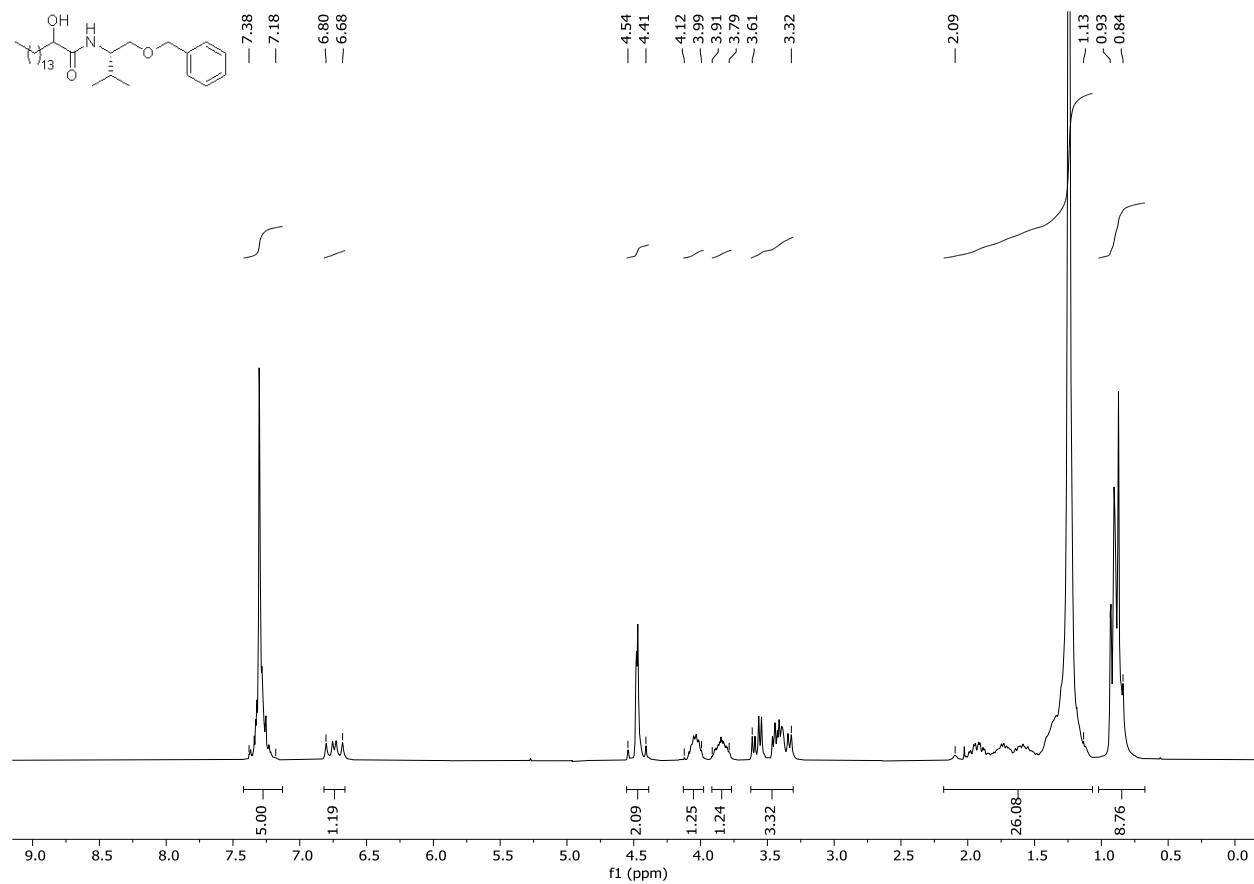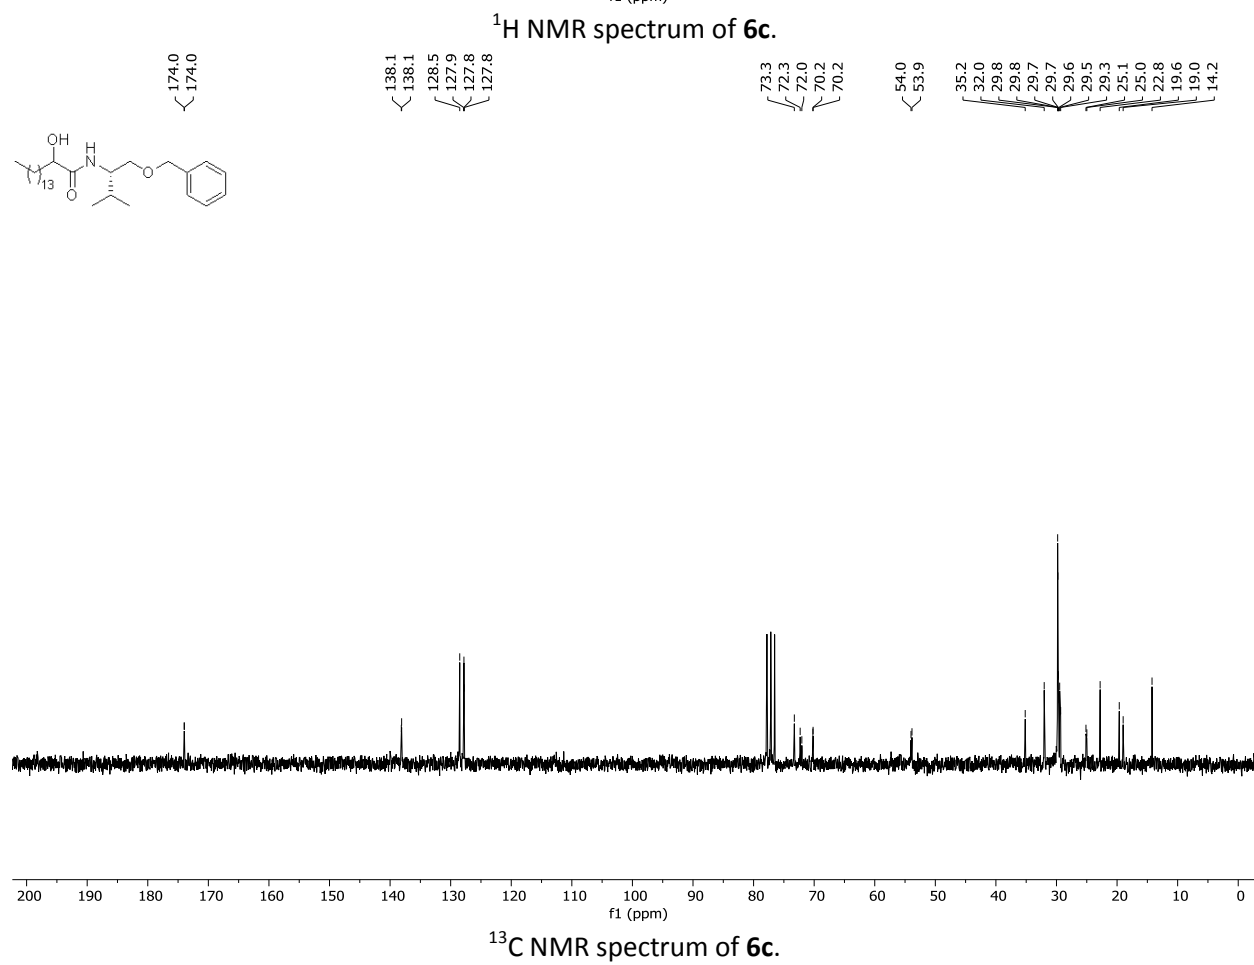

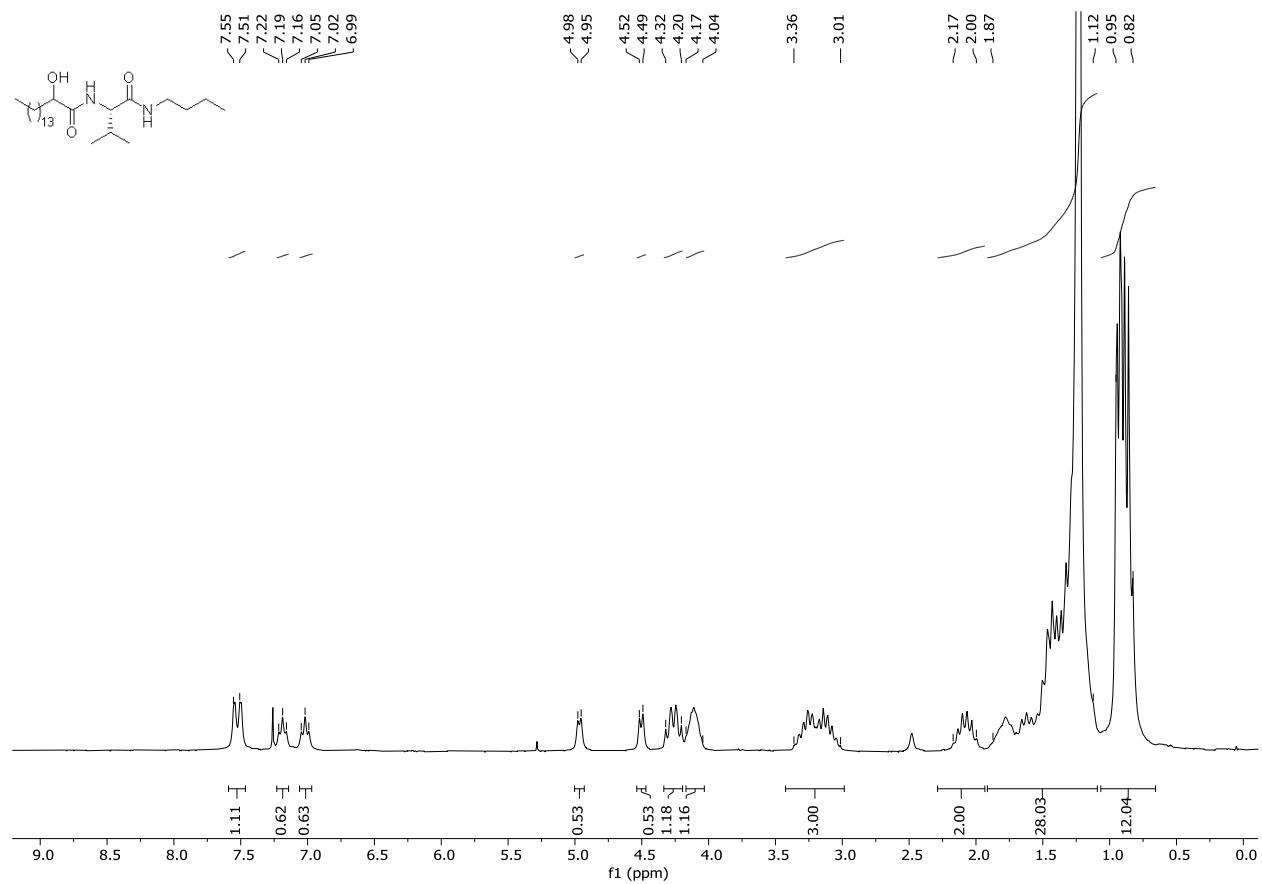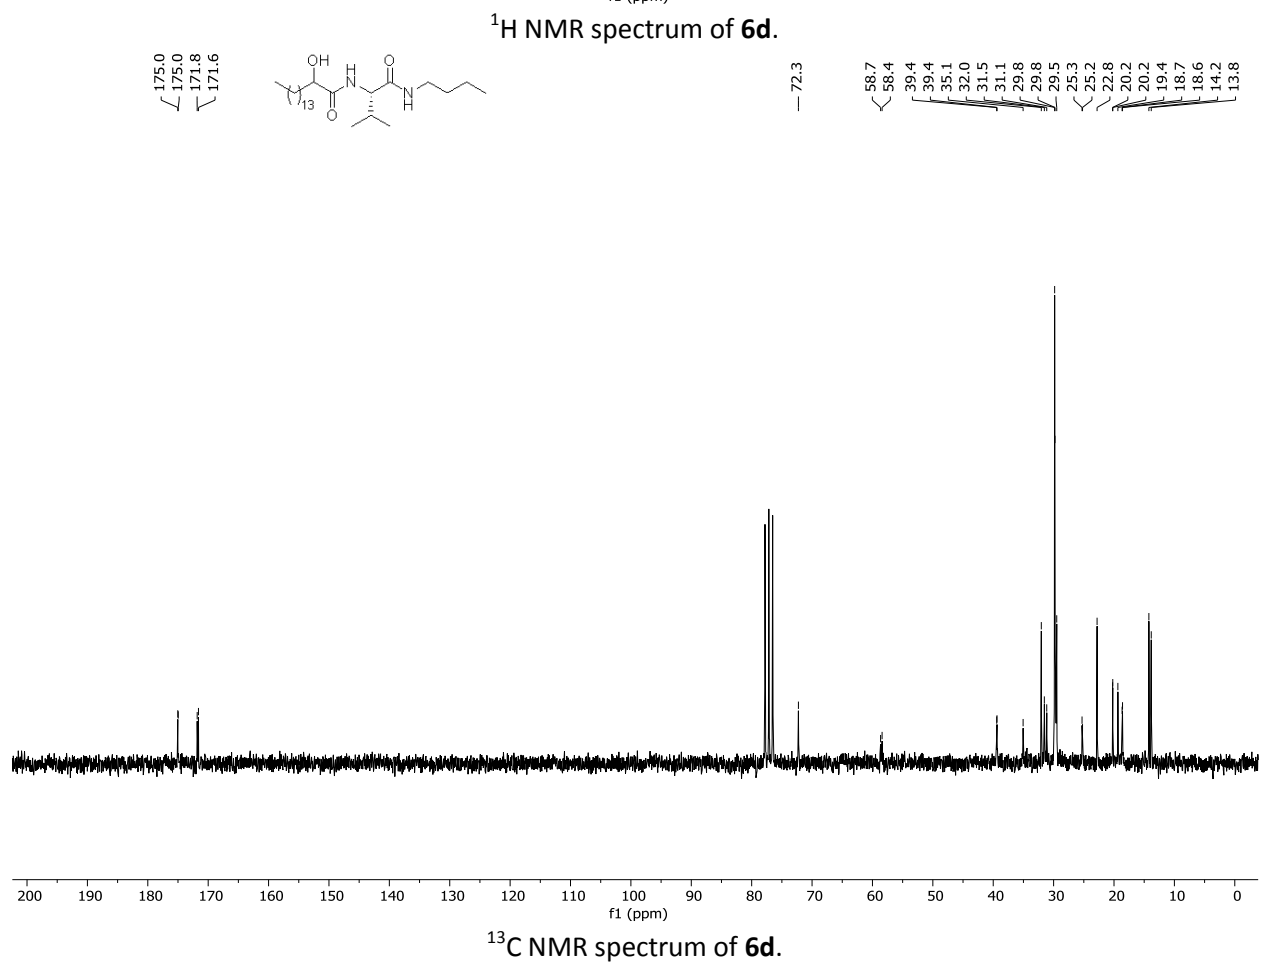

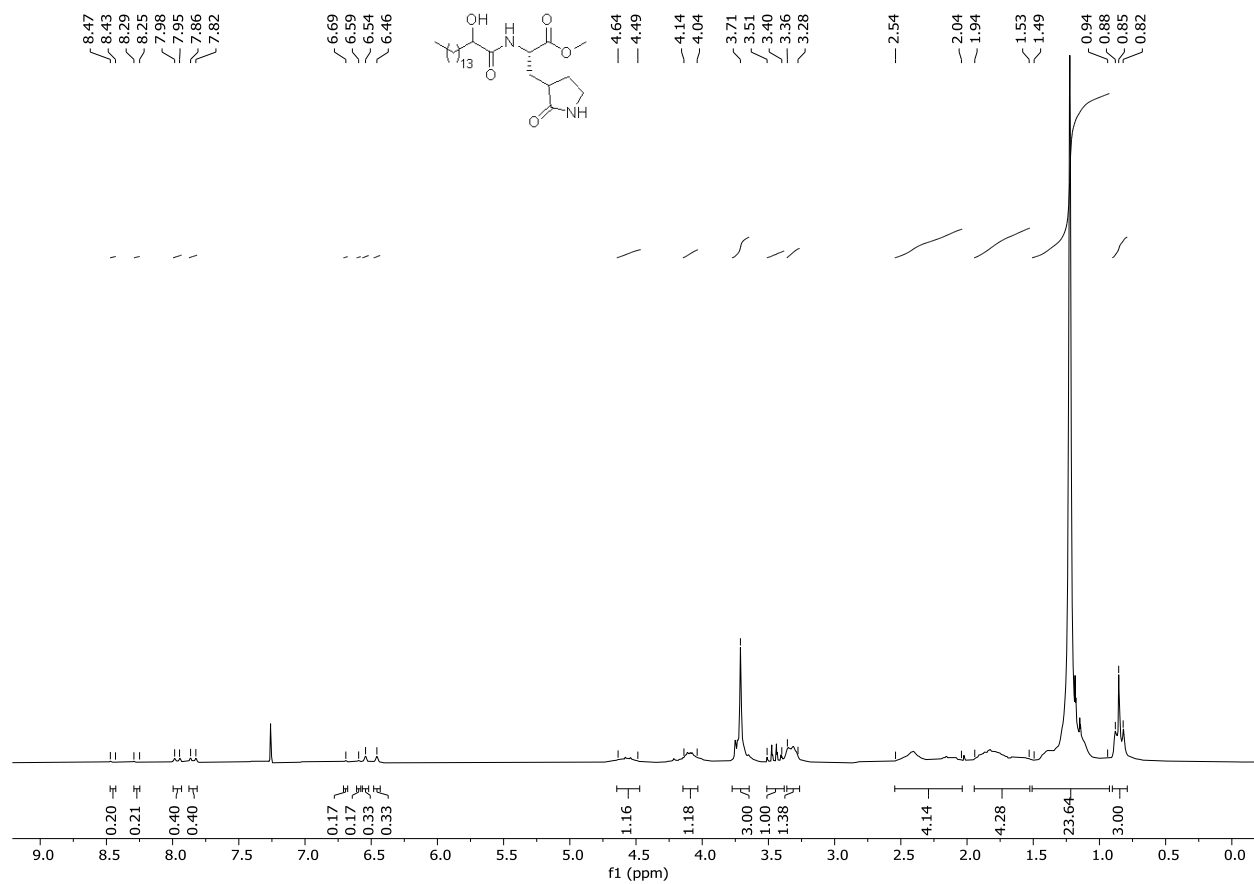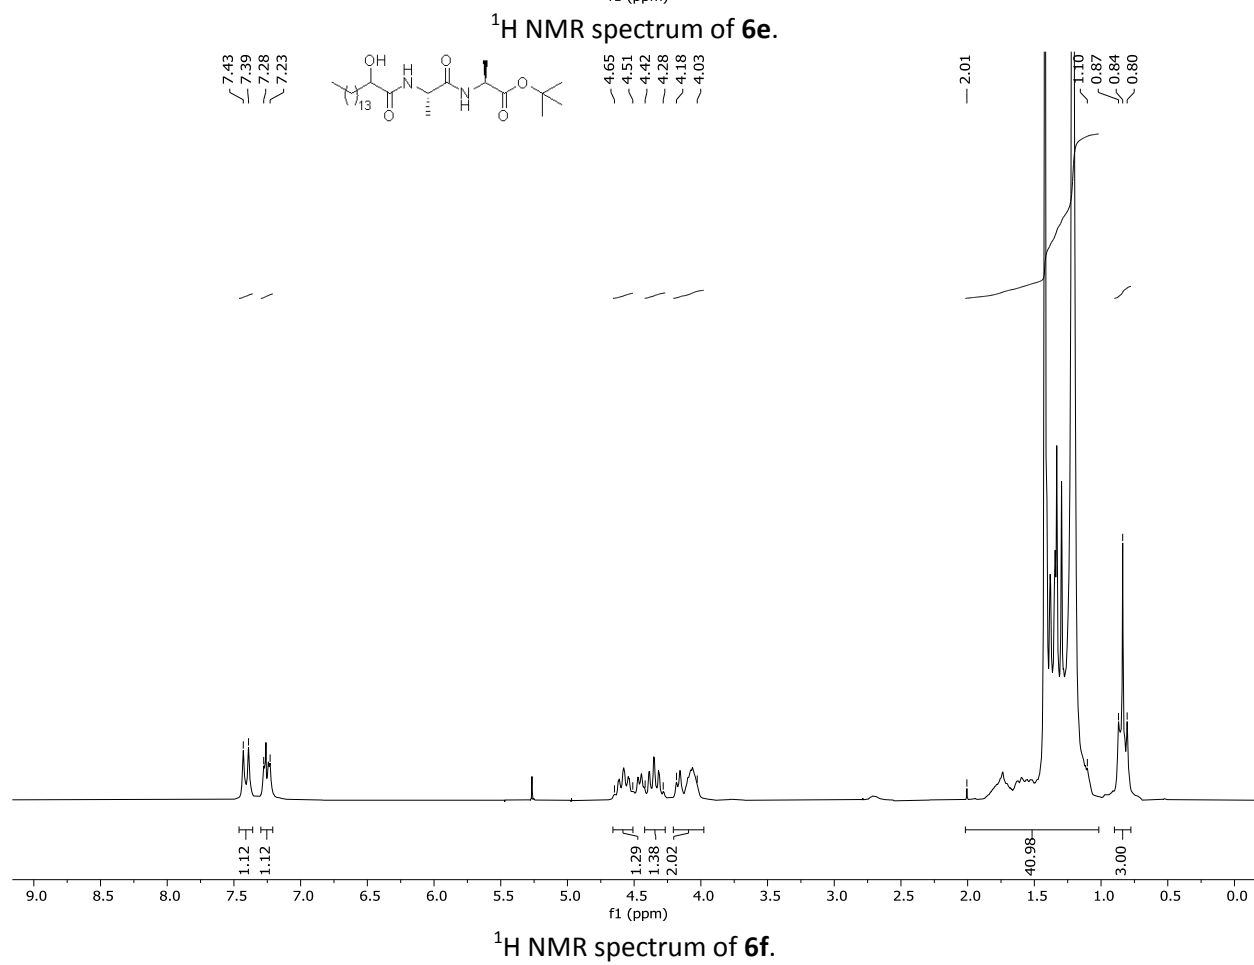

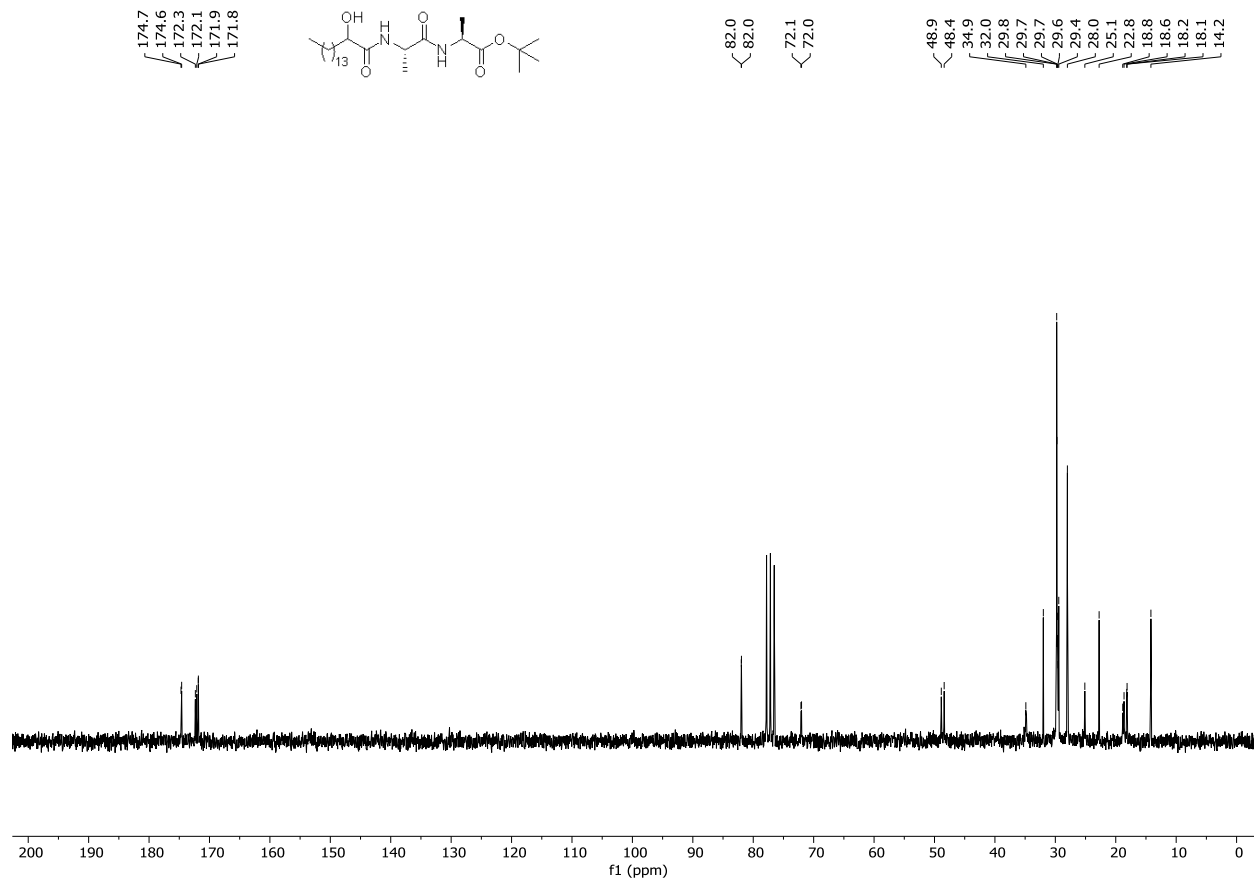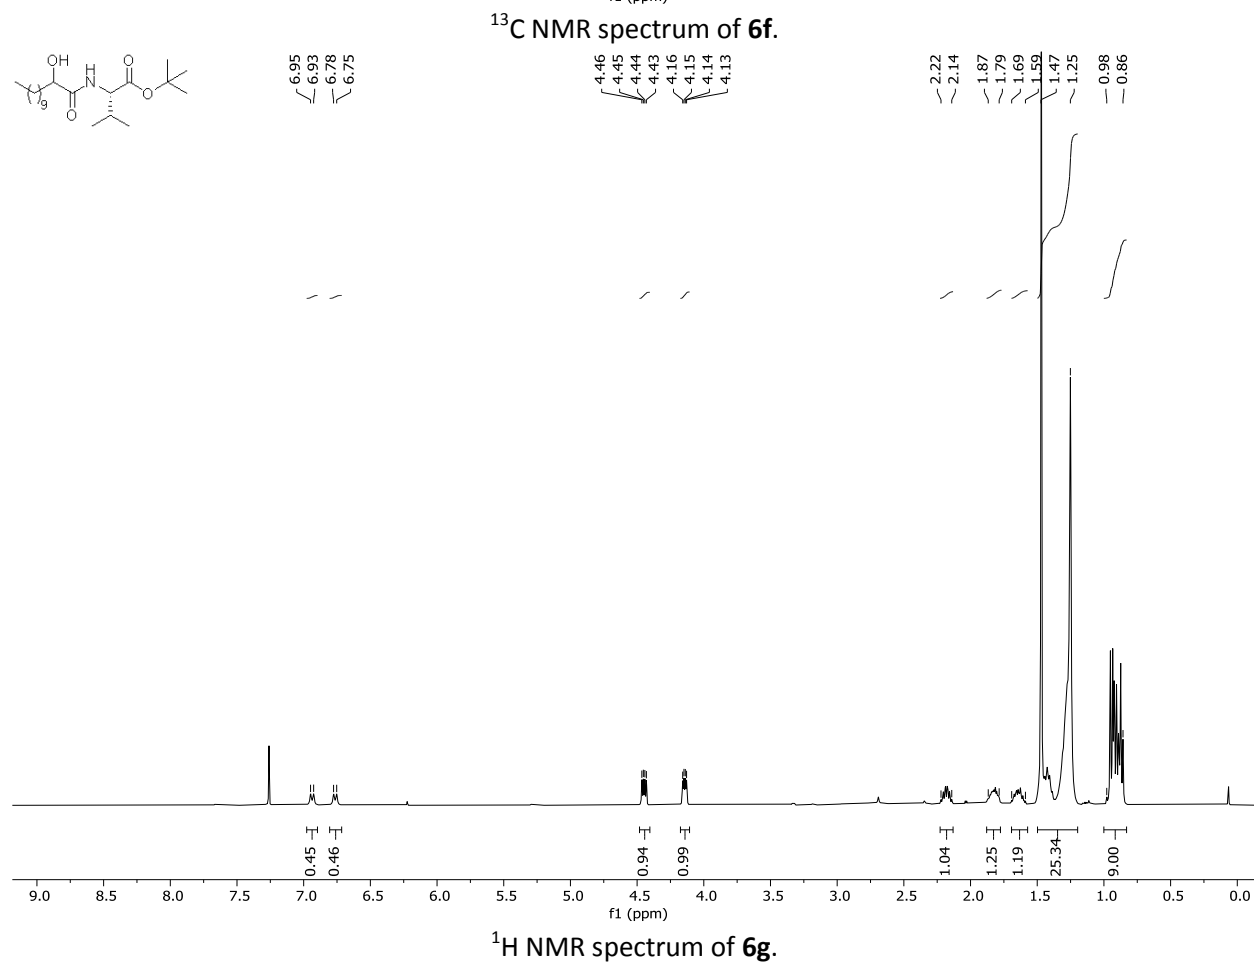

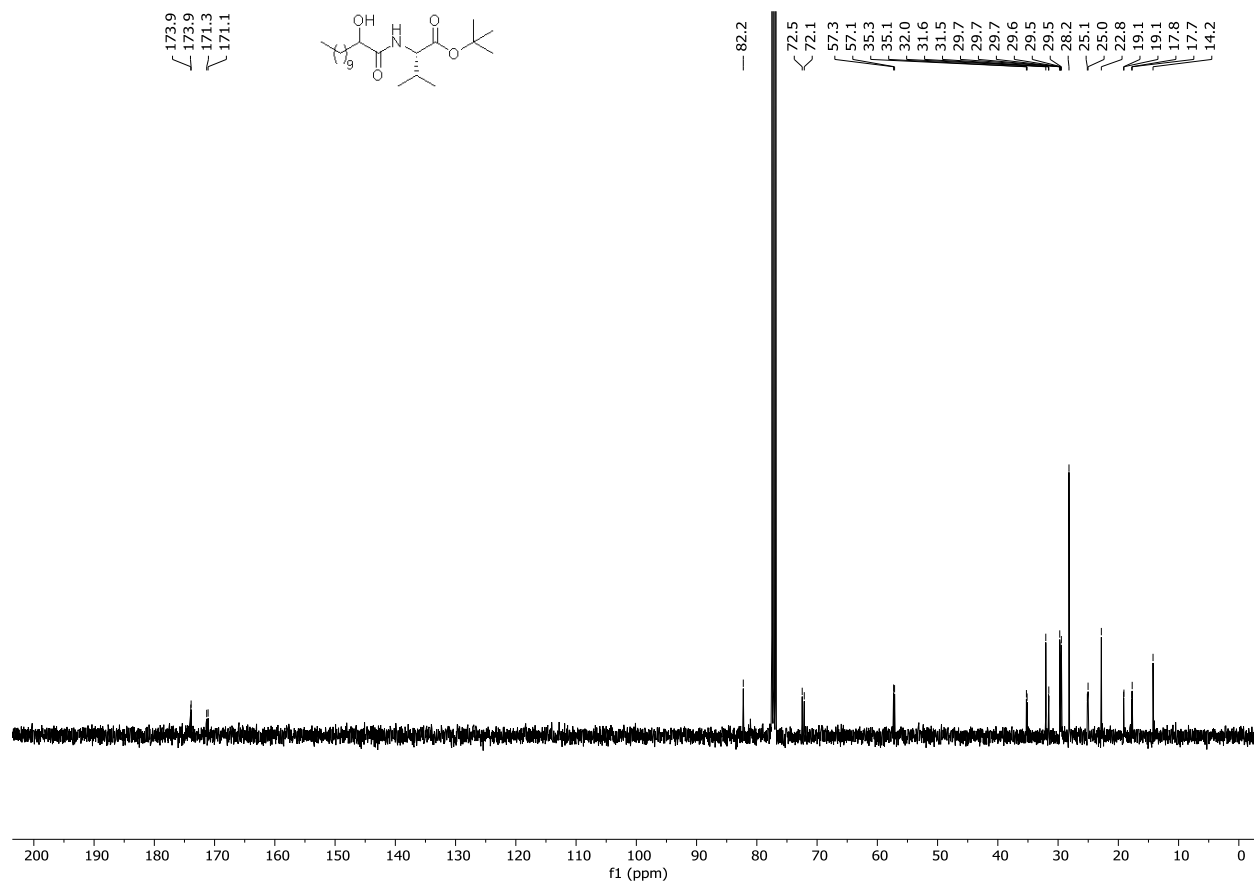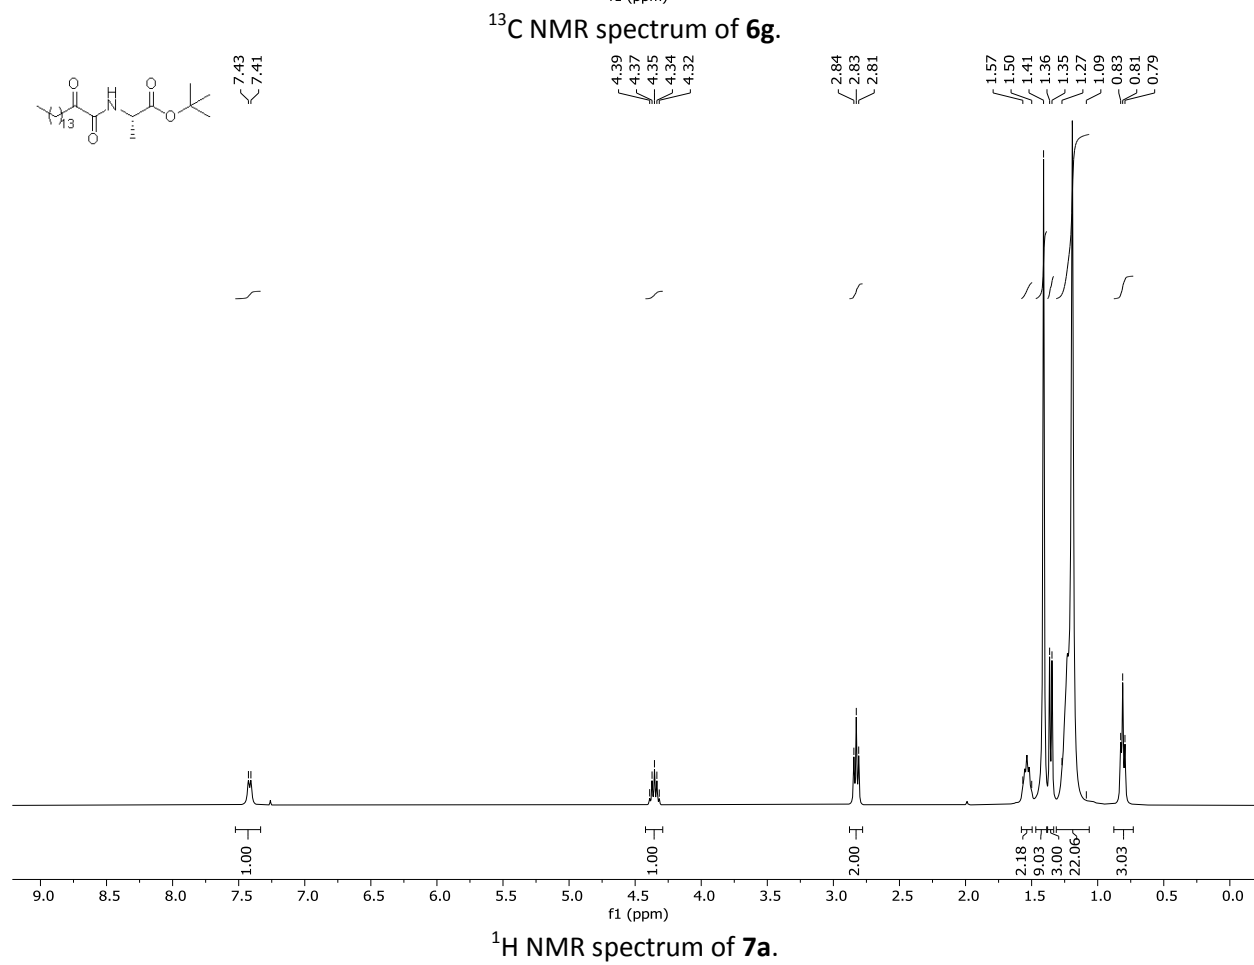

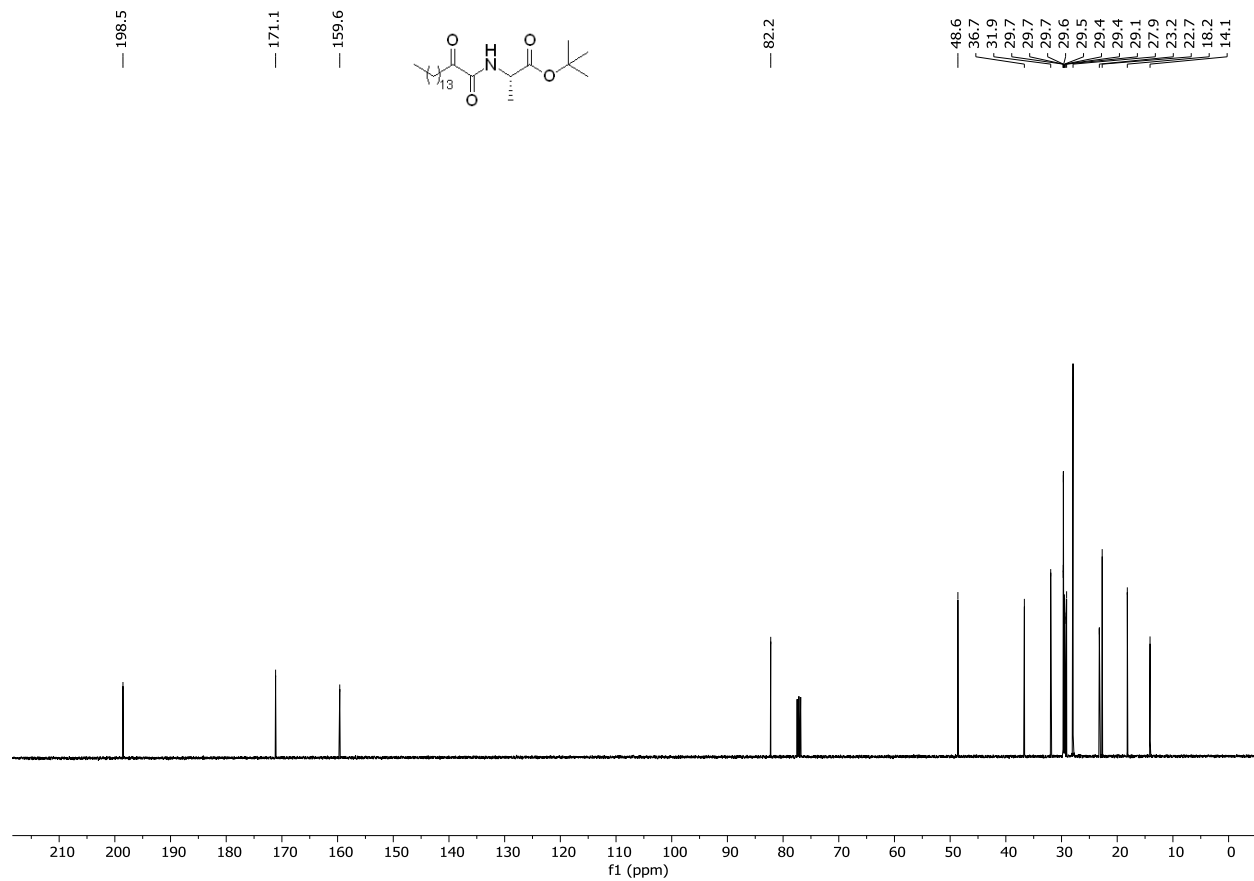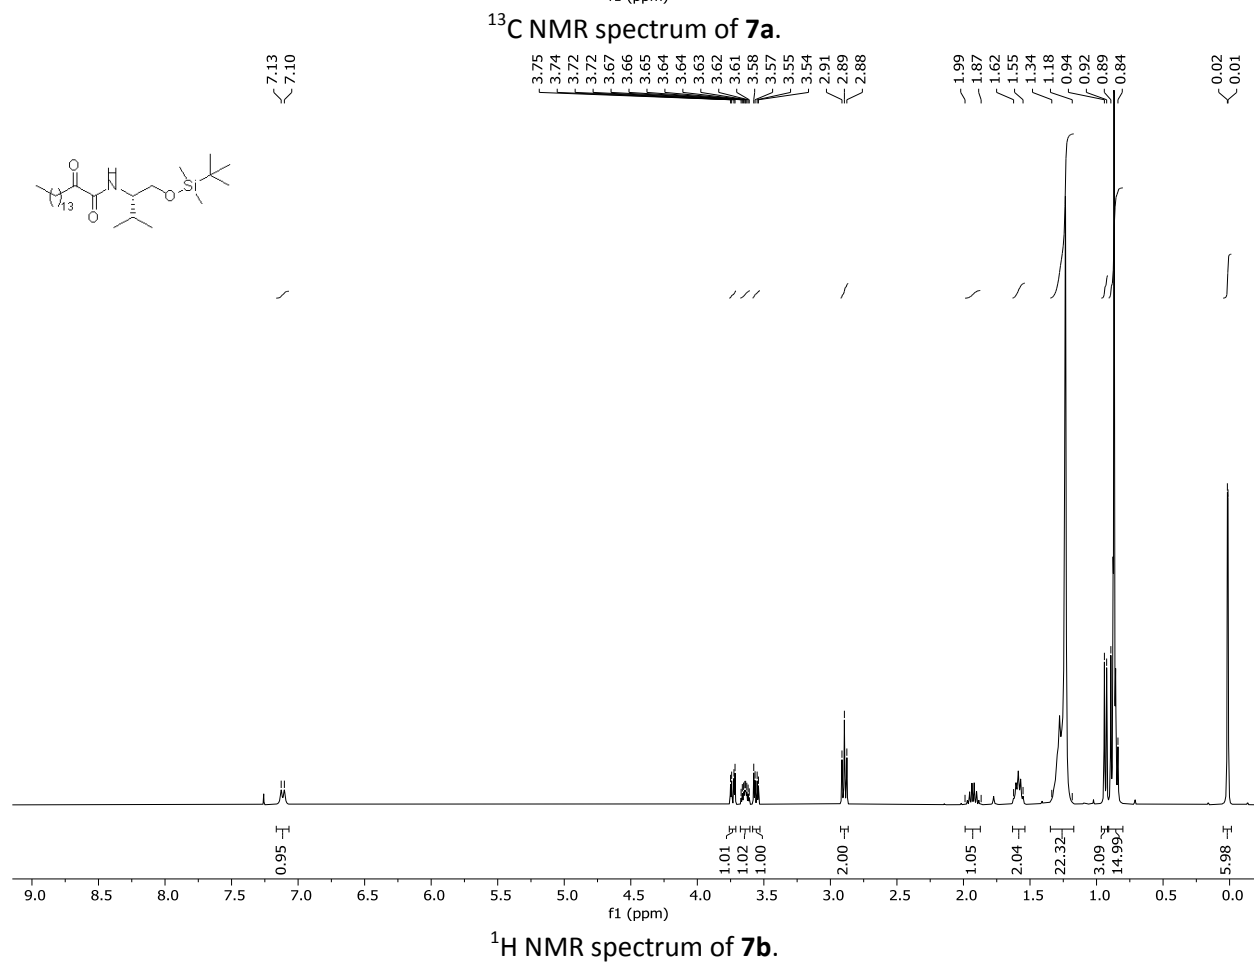



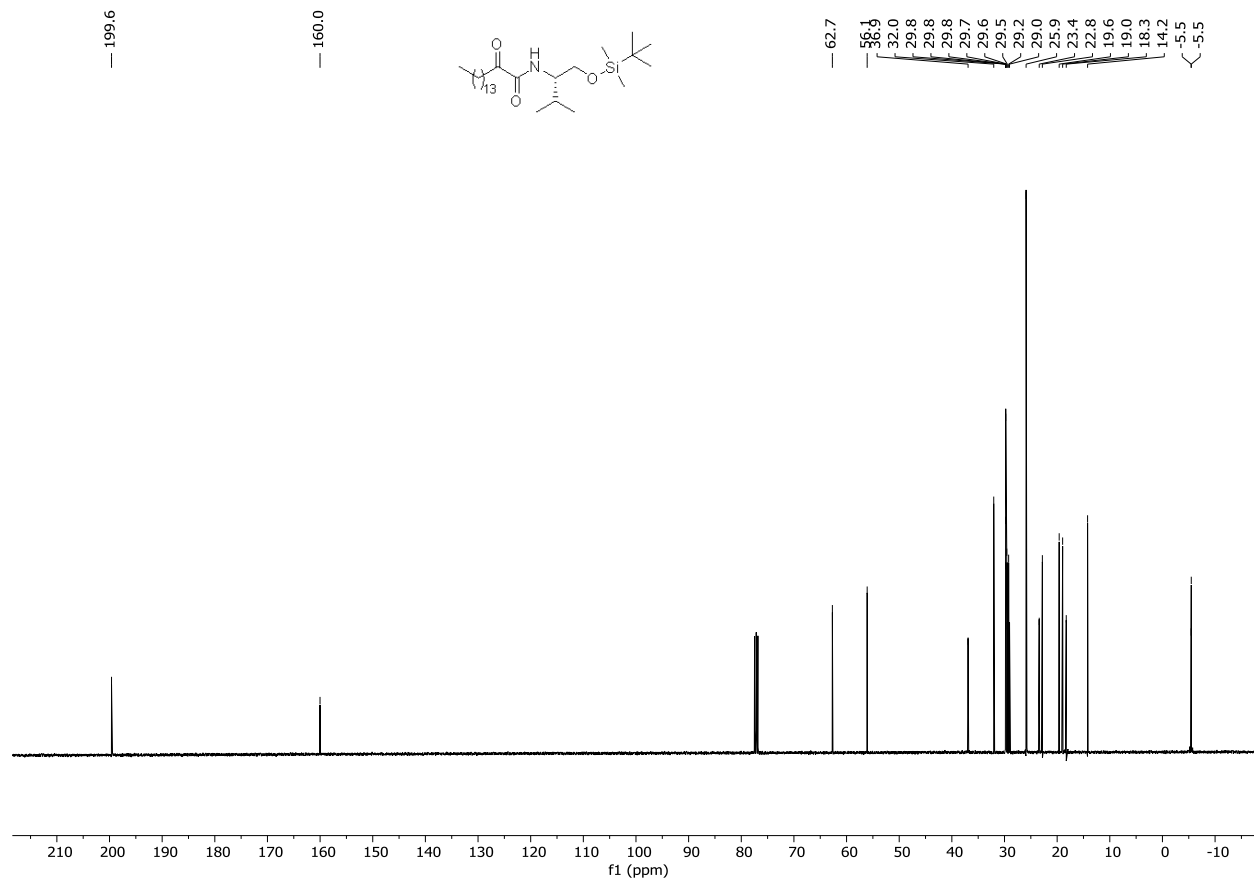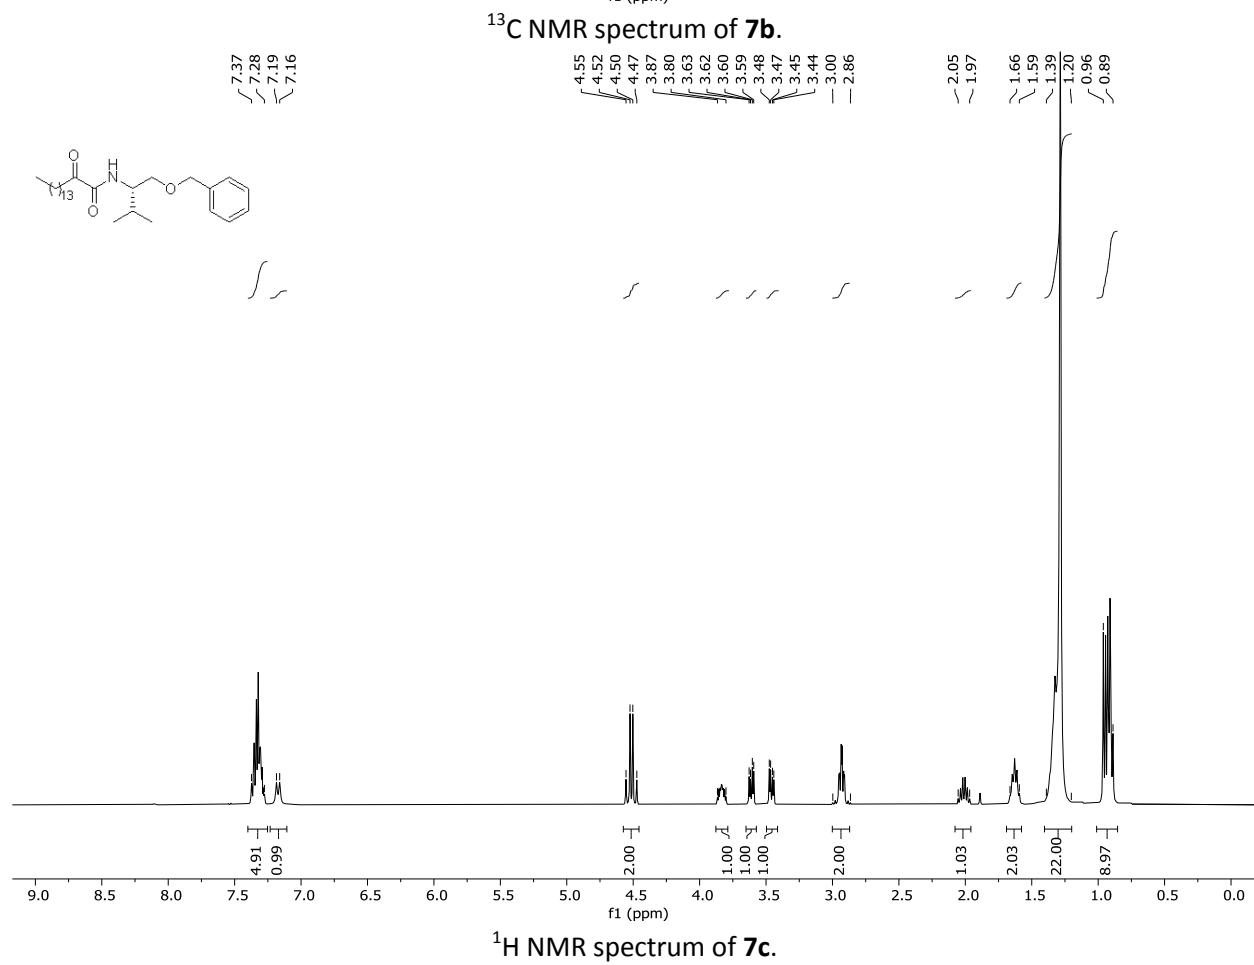

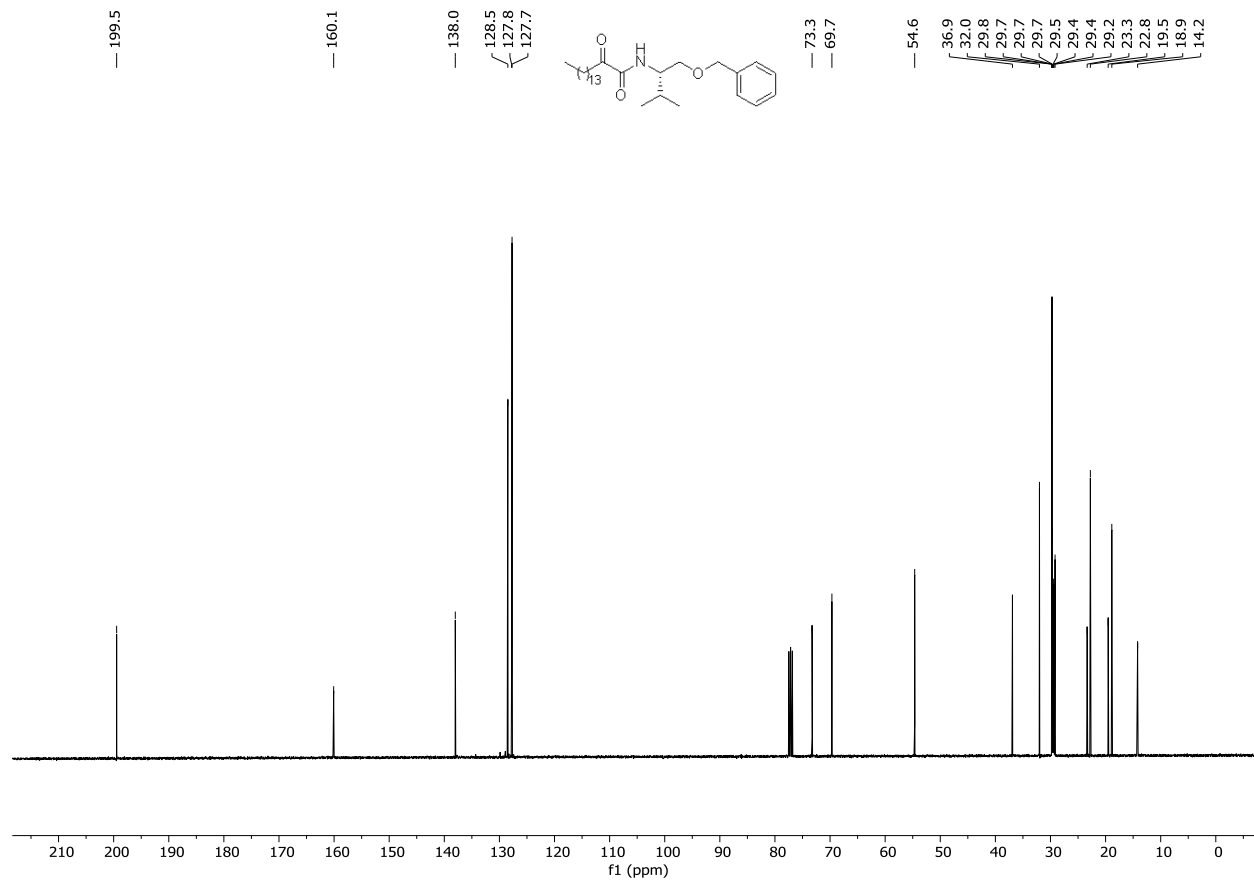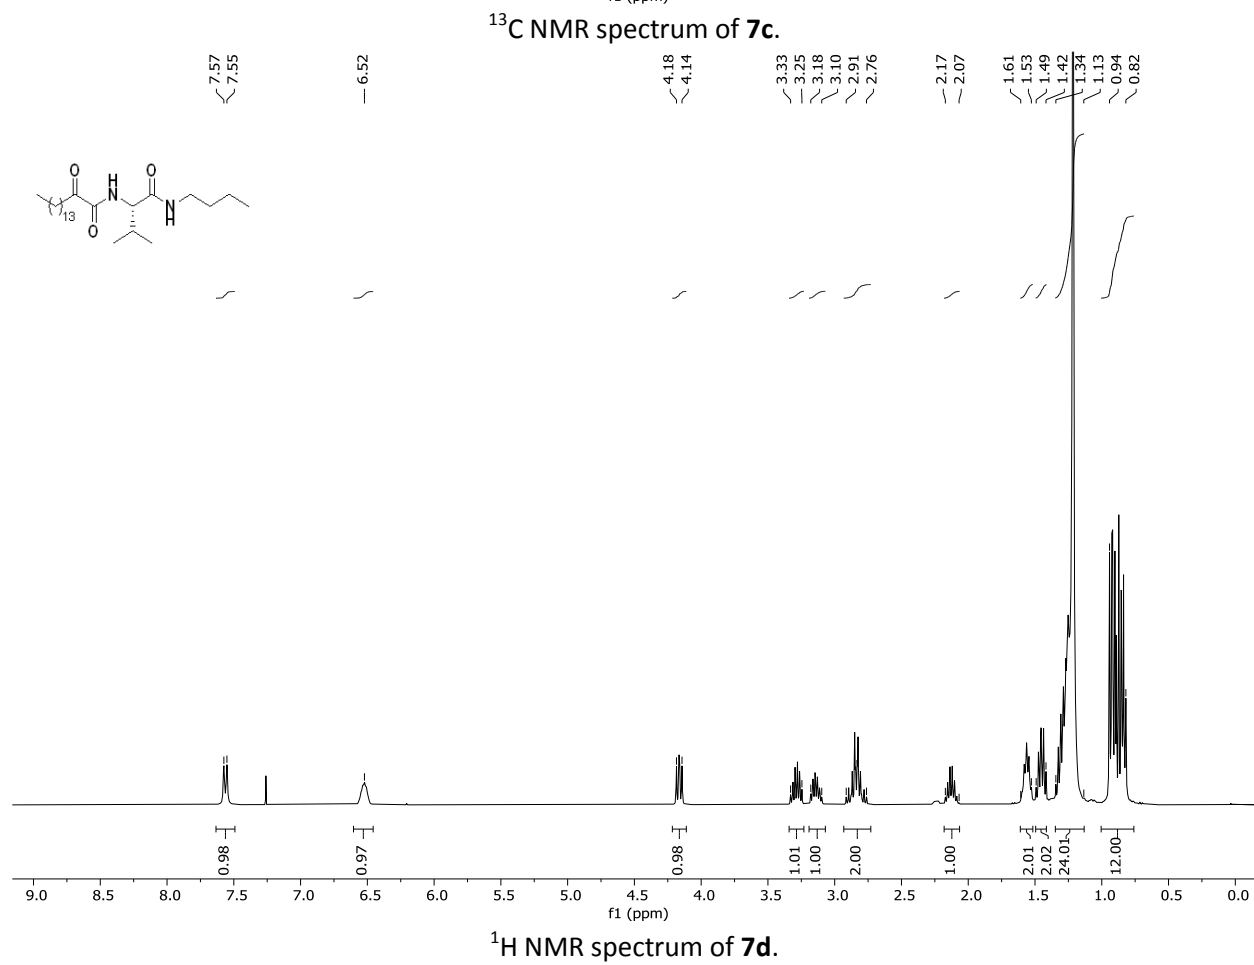

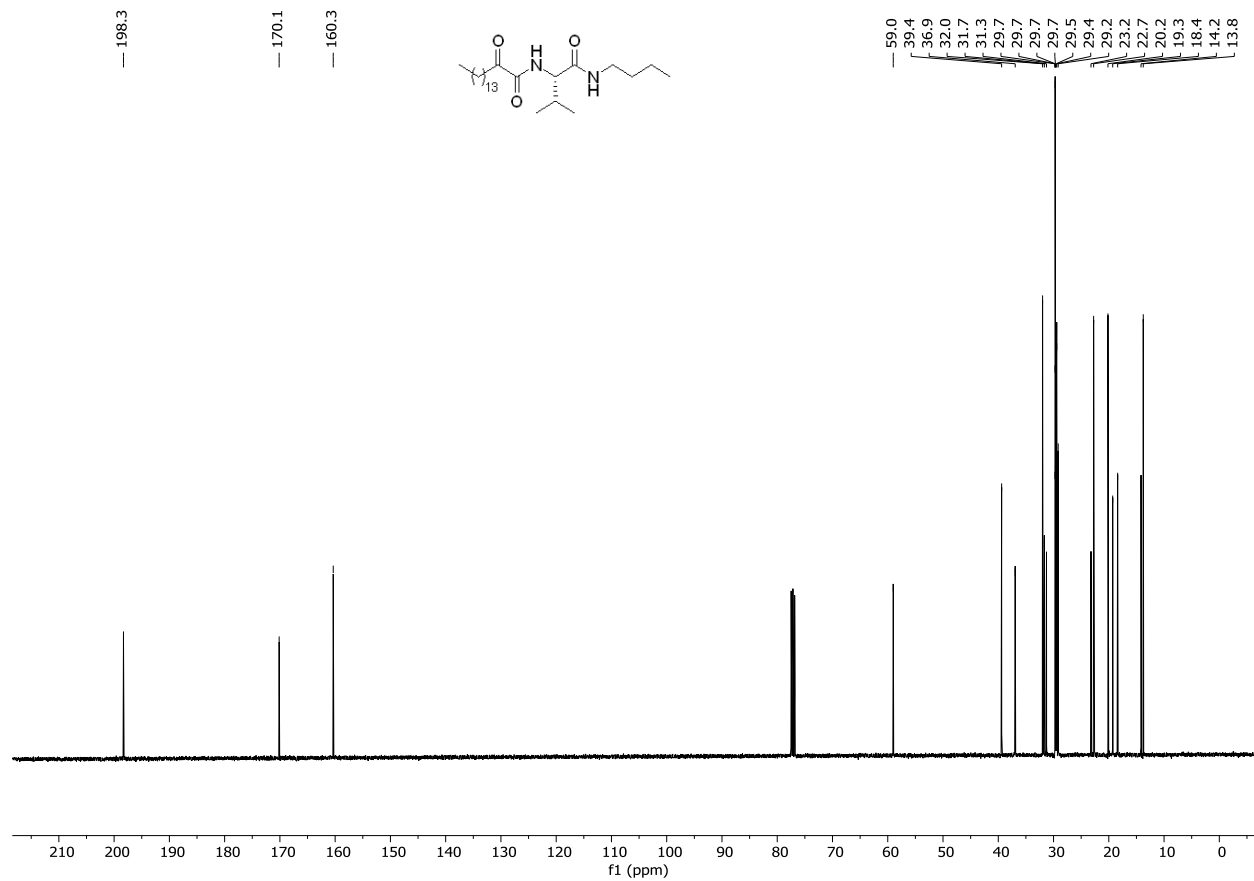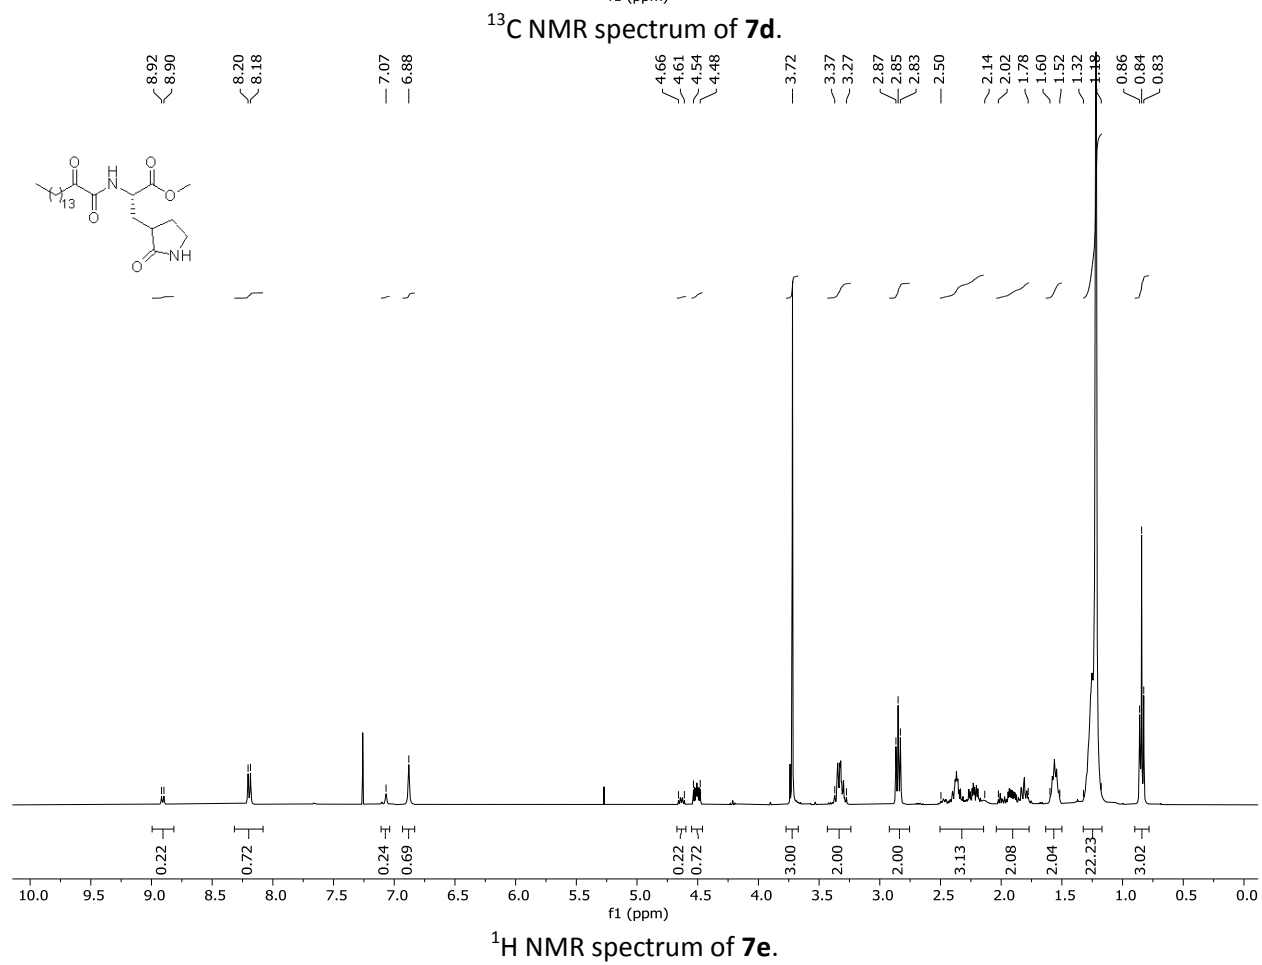

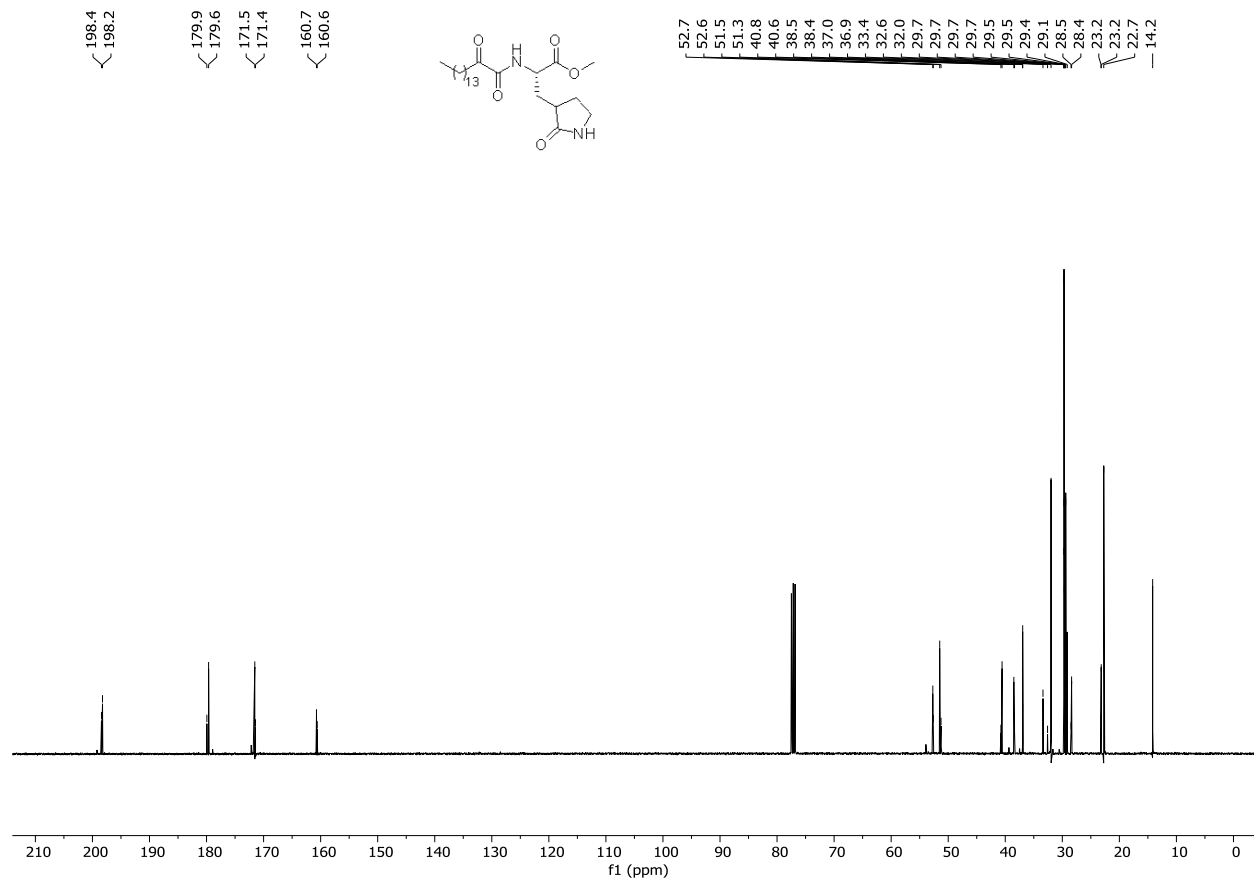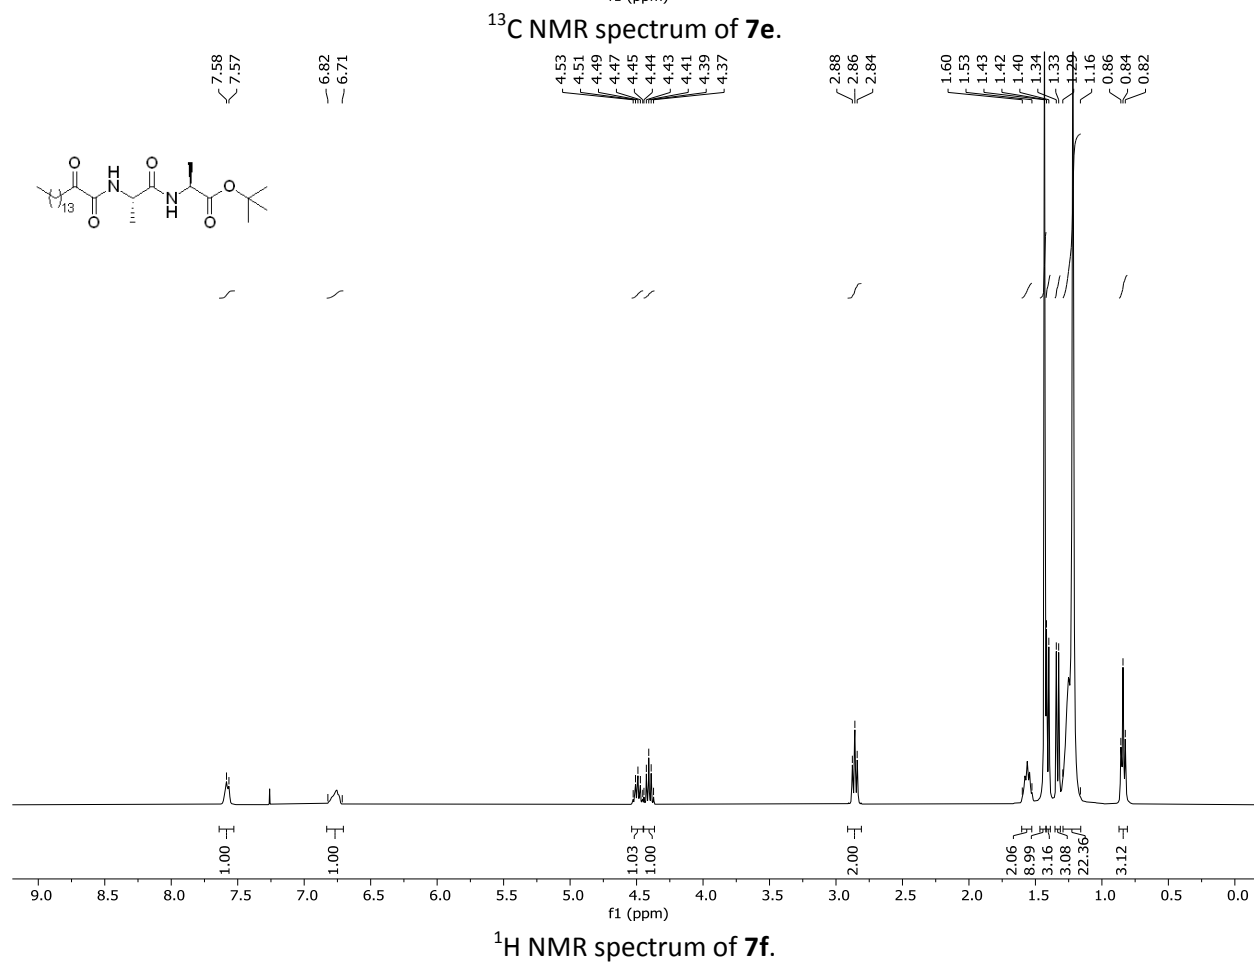

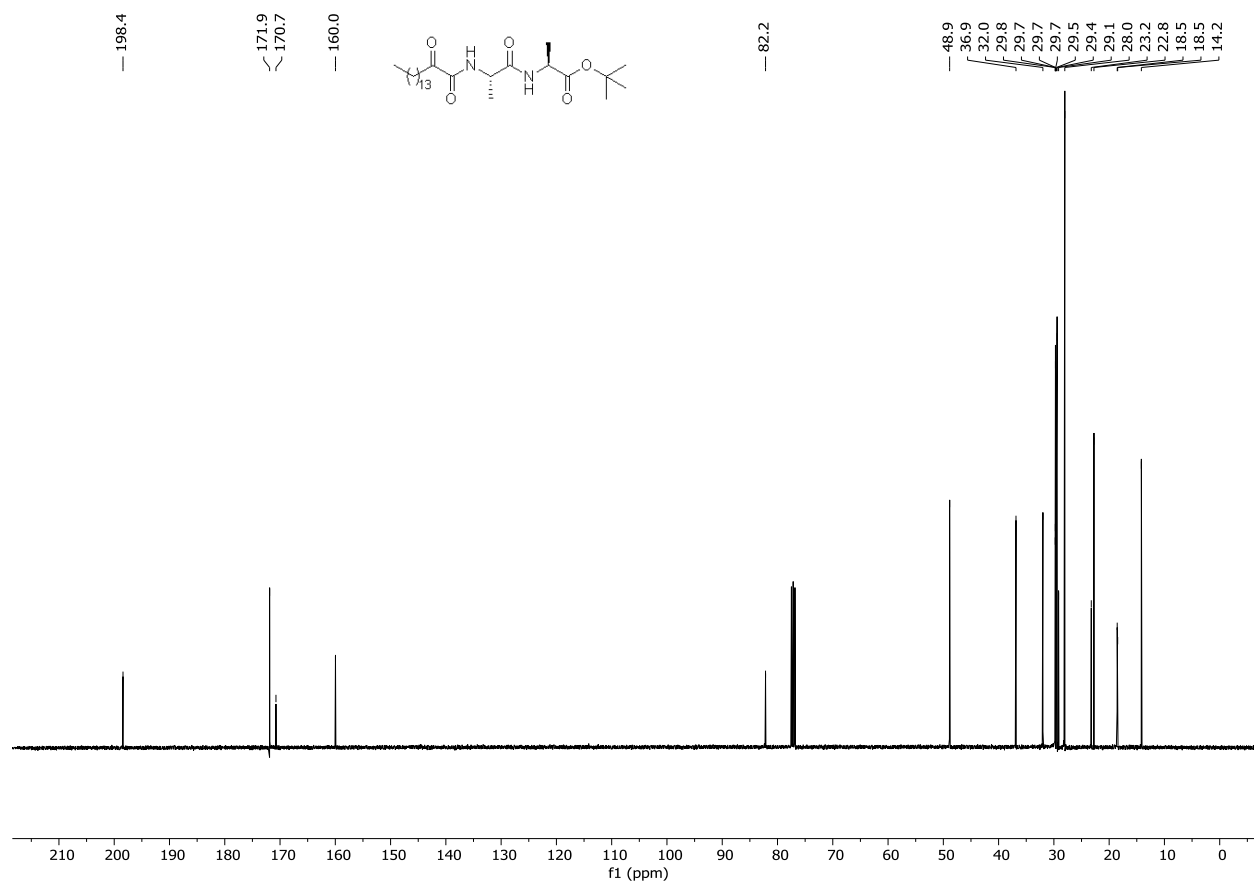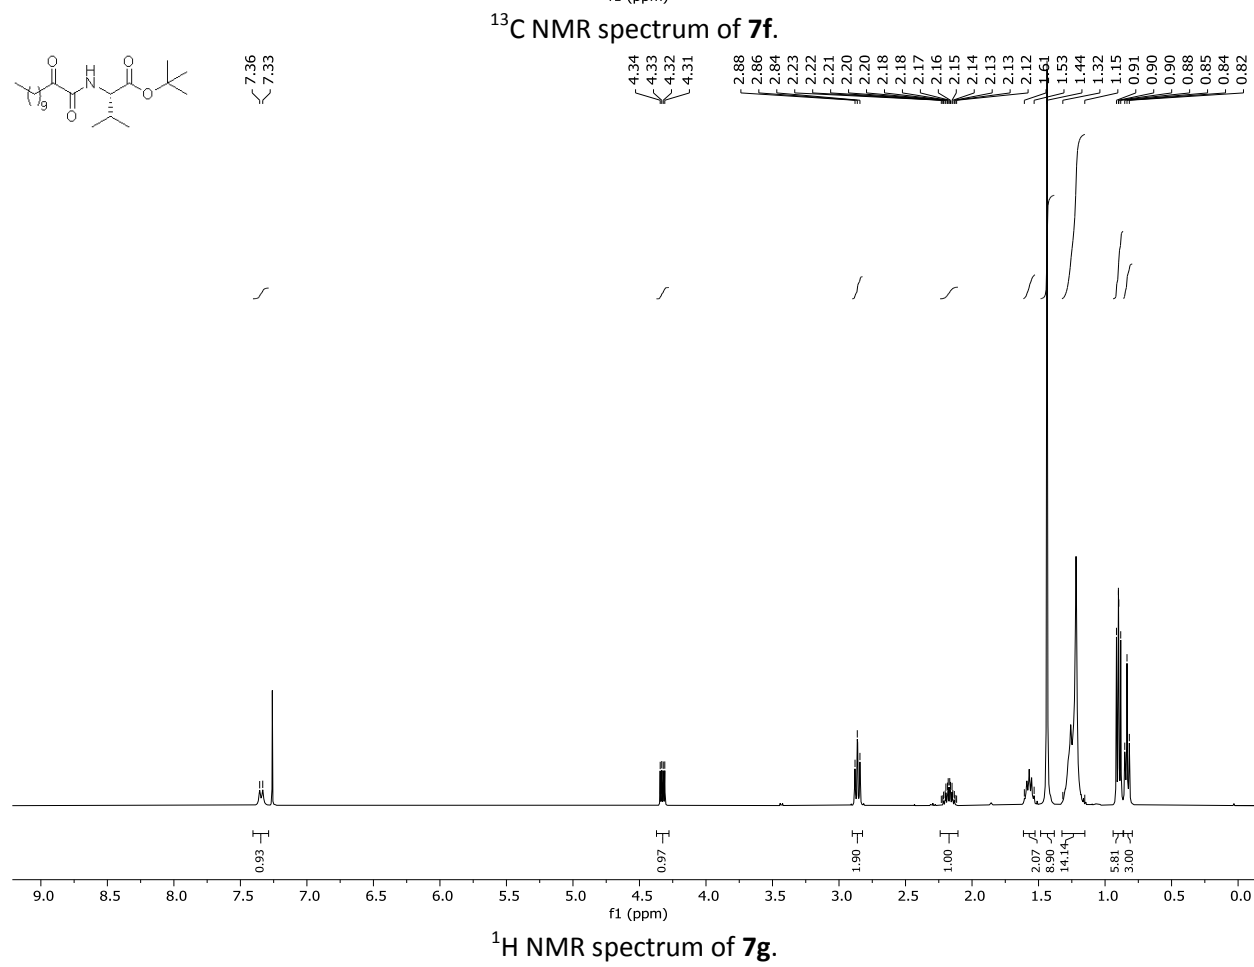

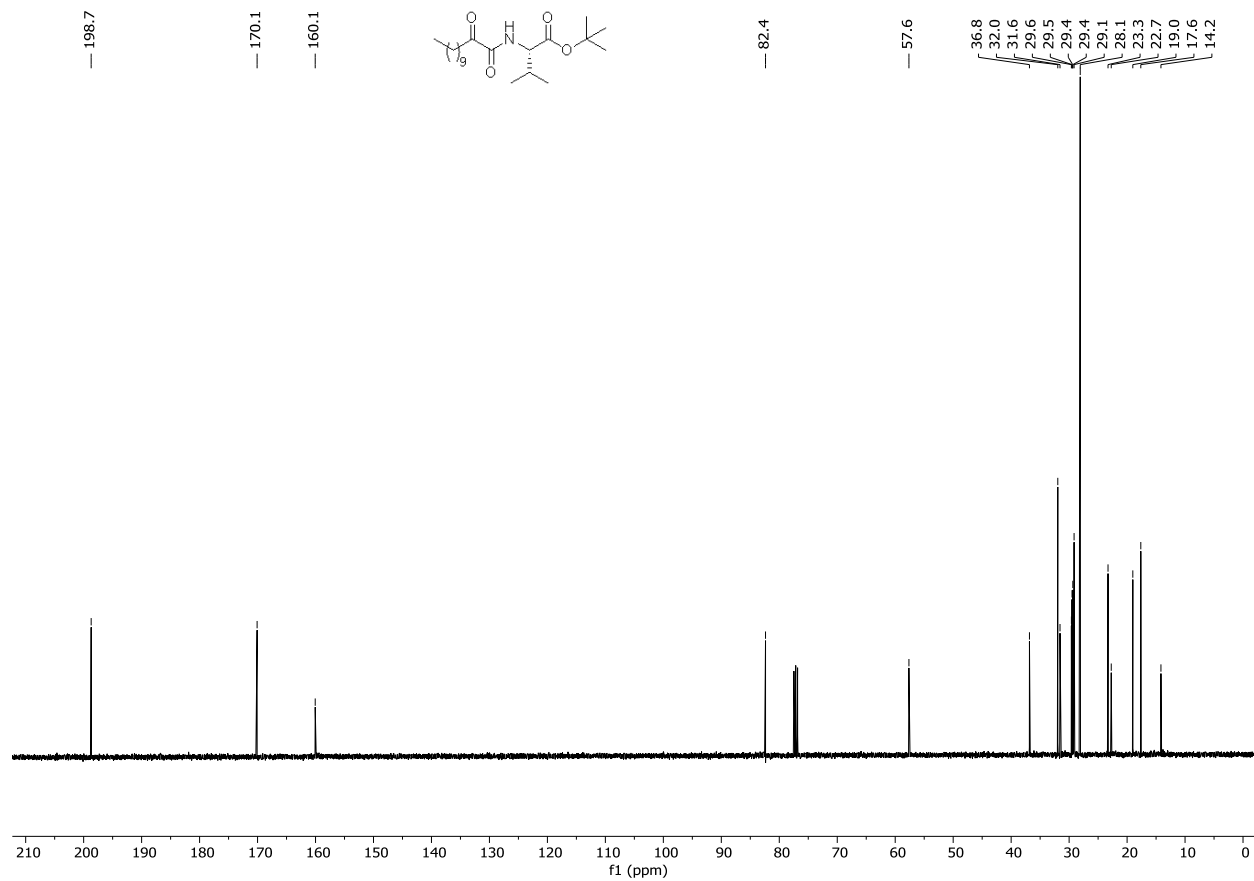

<sup>13</sup>C NMR spectrum of 7g.

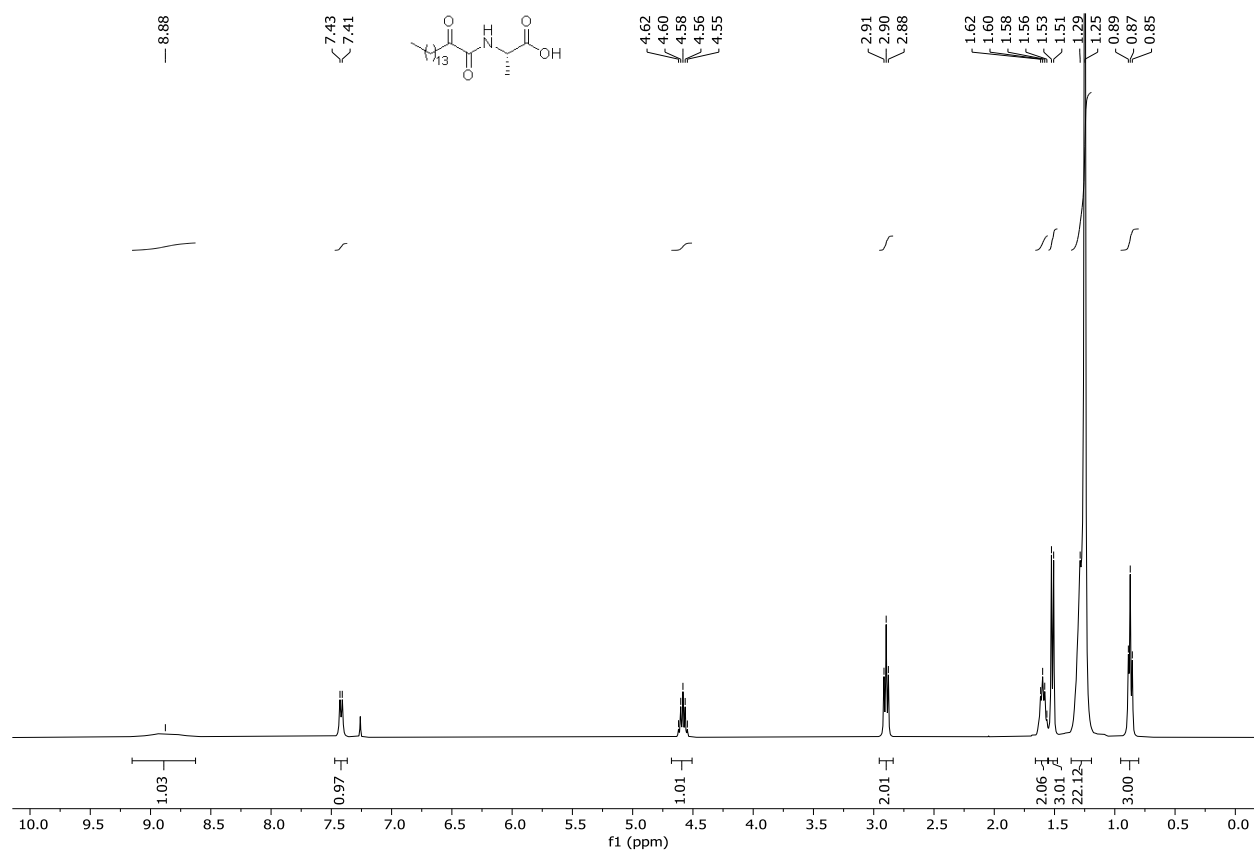

<sup>1</sup>H NMR spectrum of 8a.

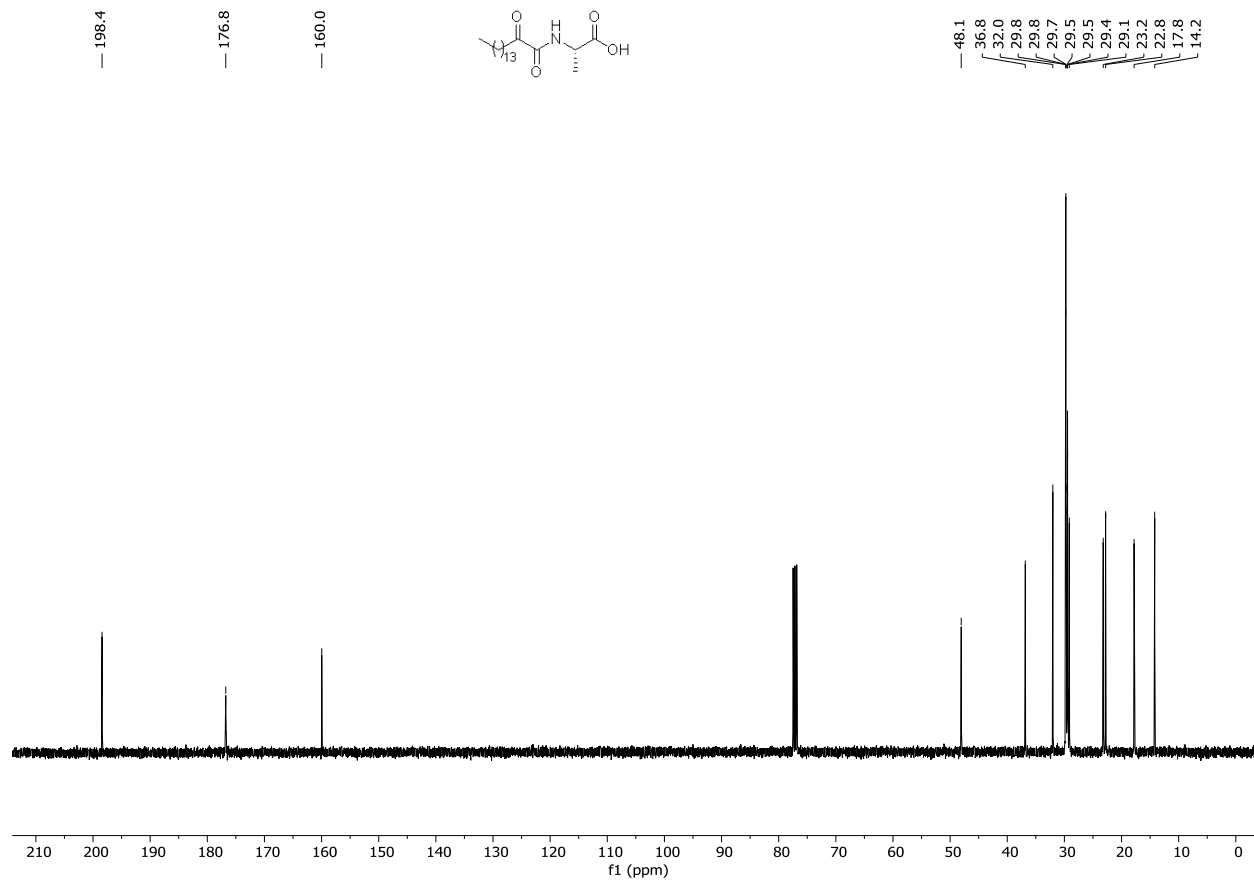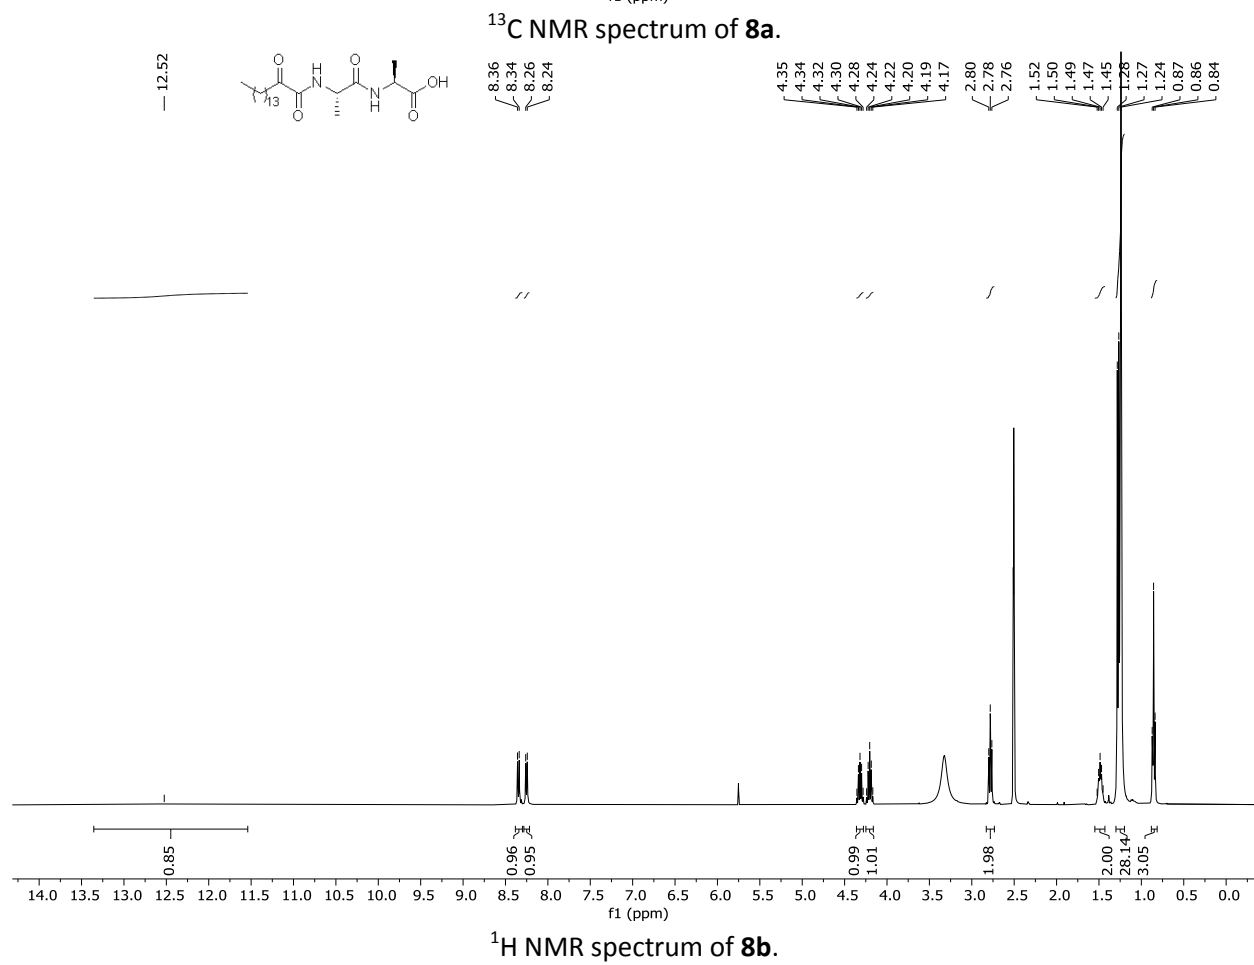

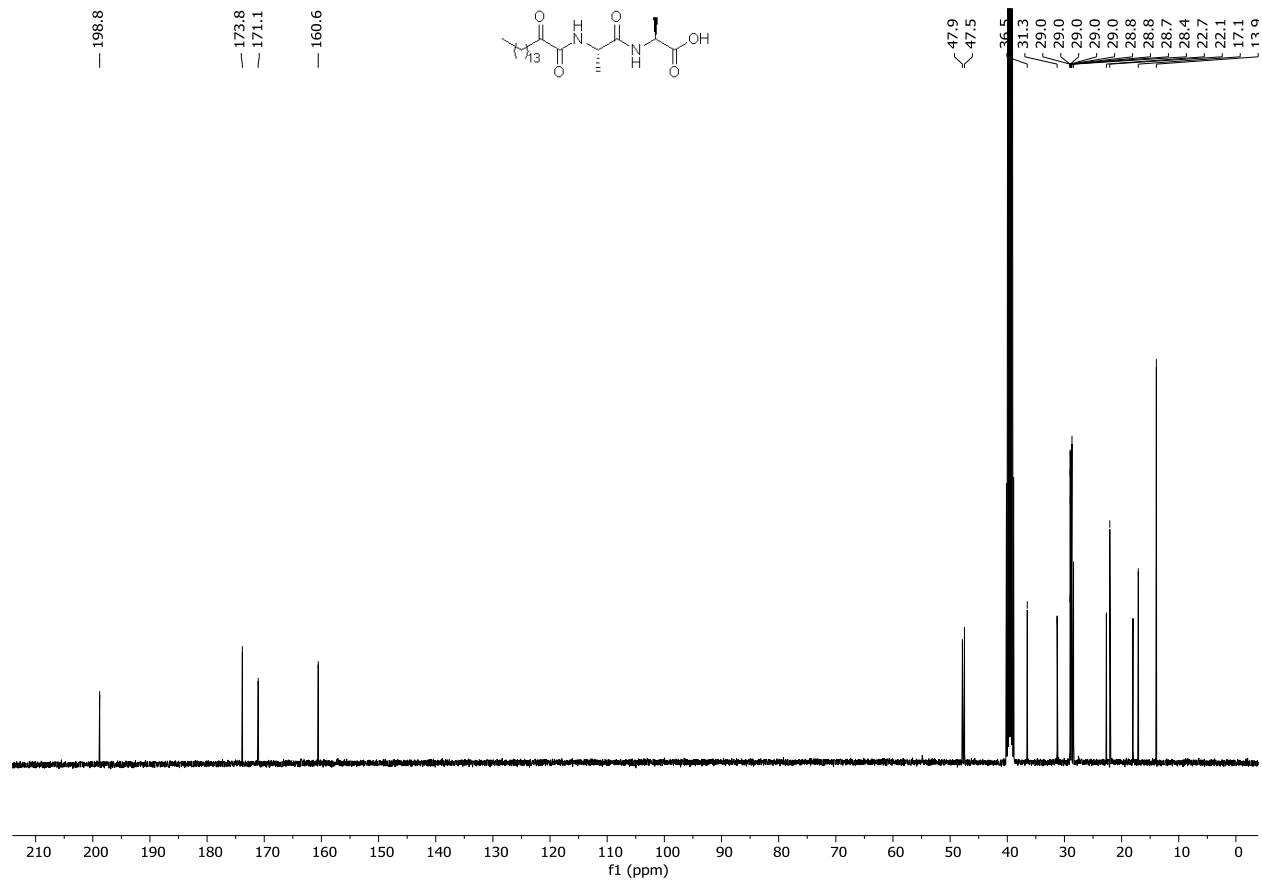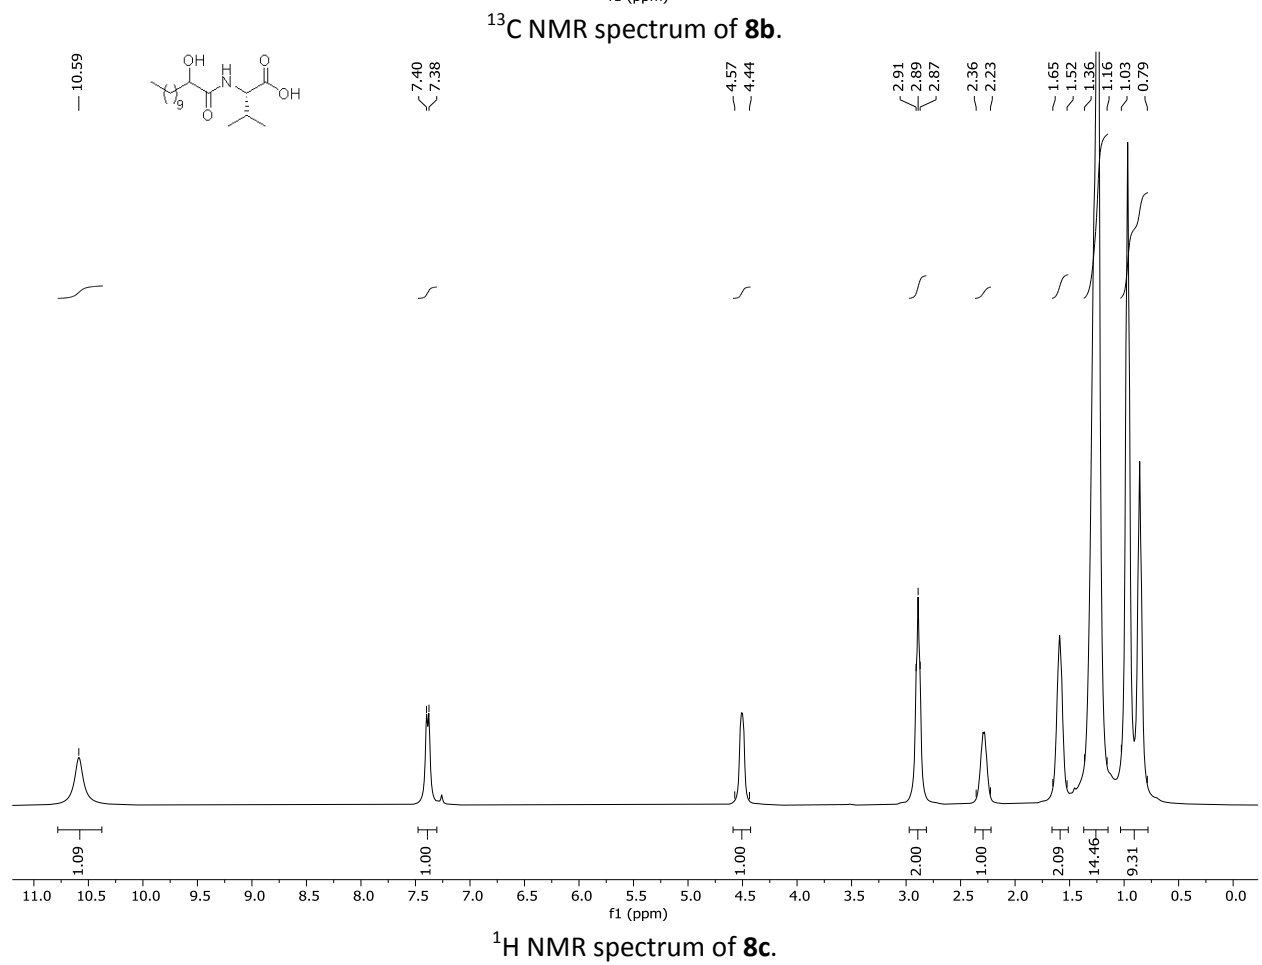



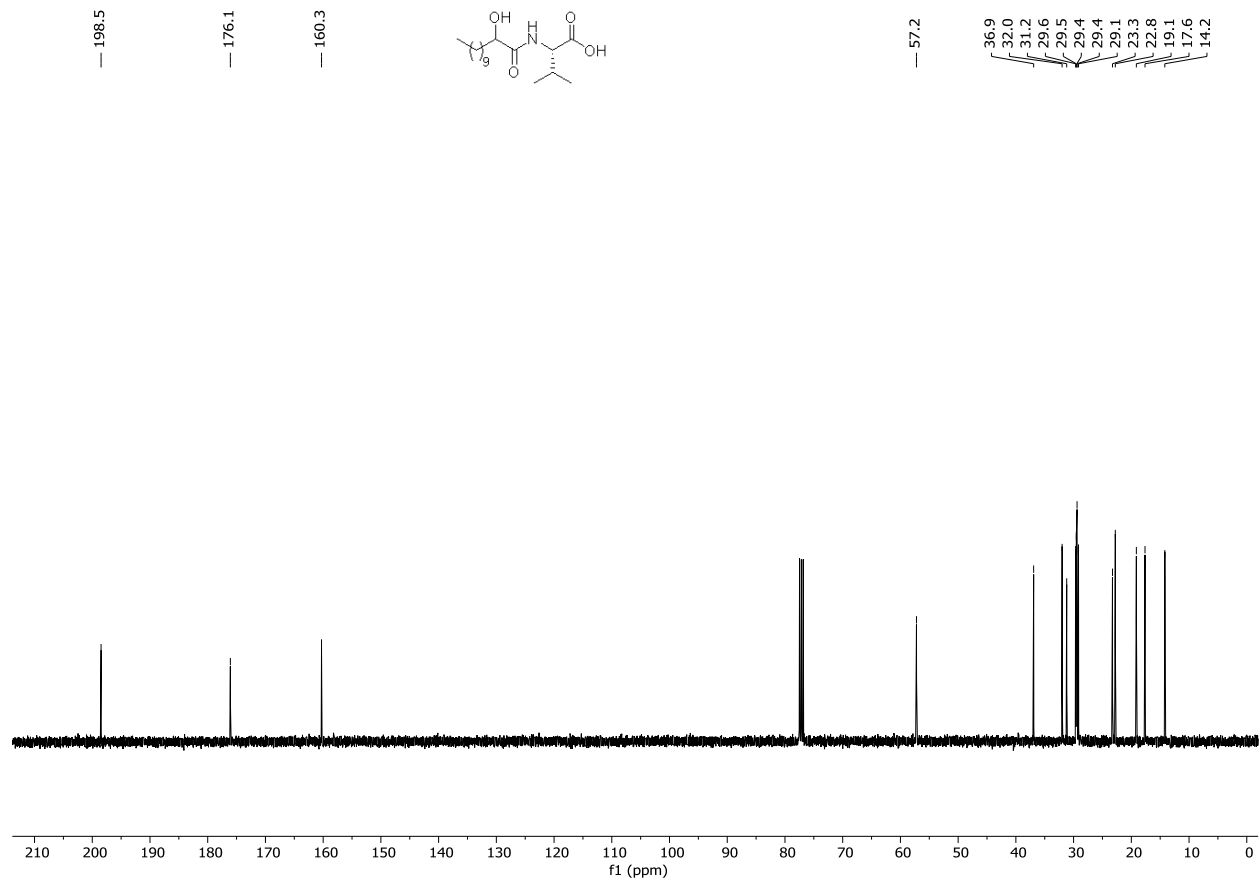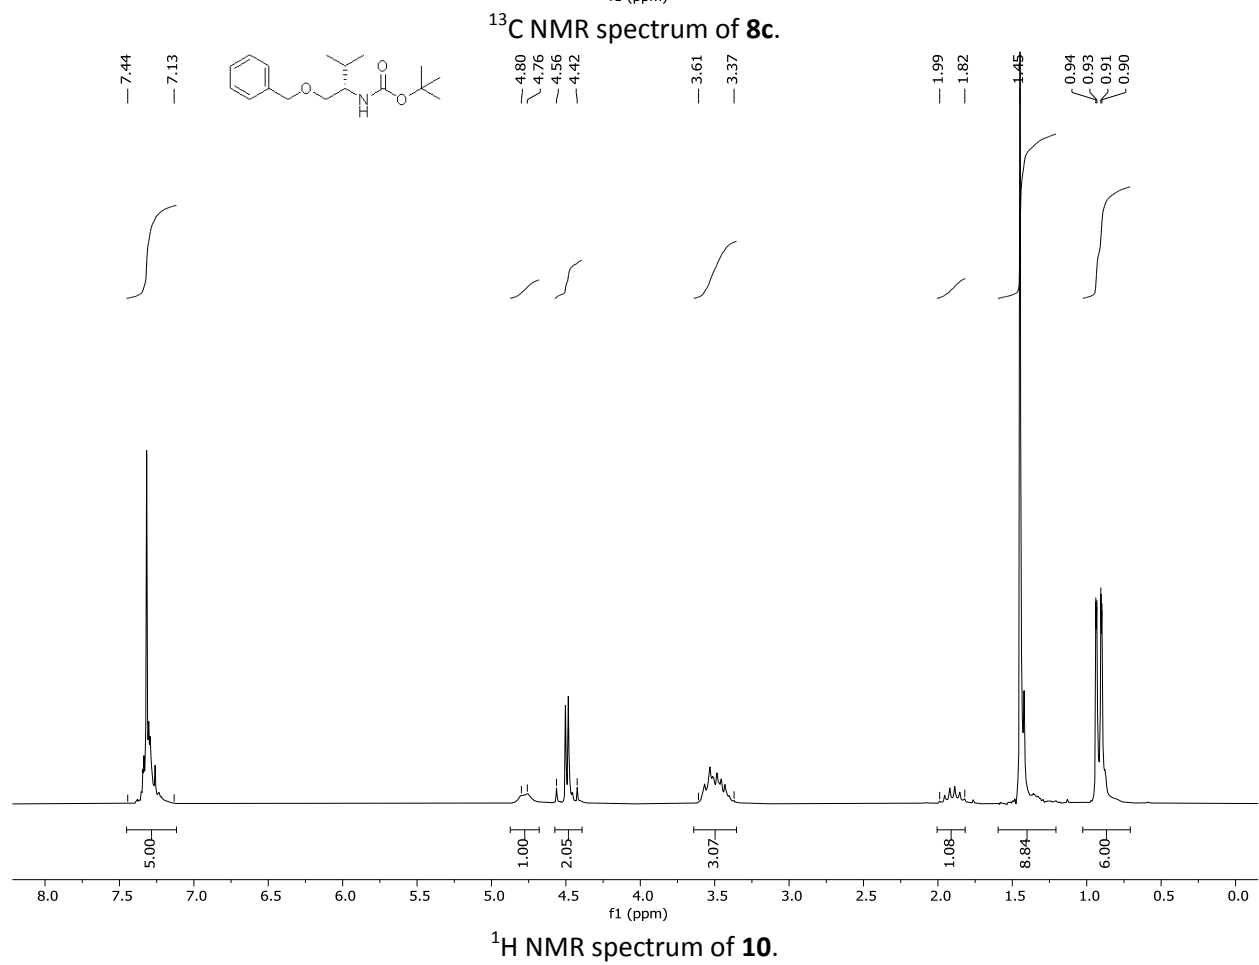

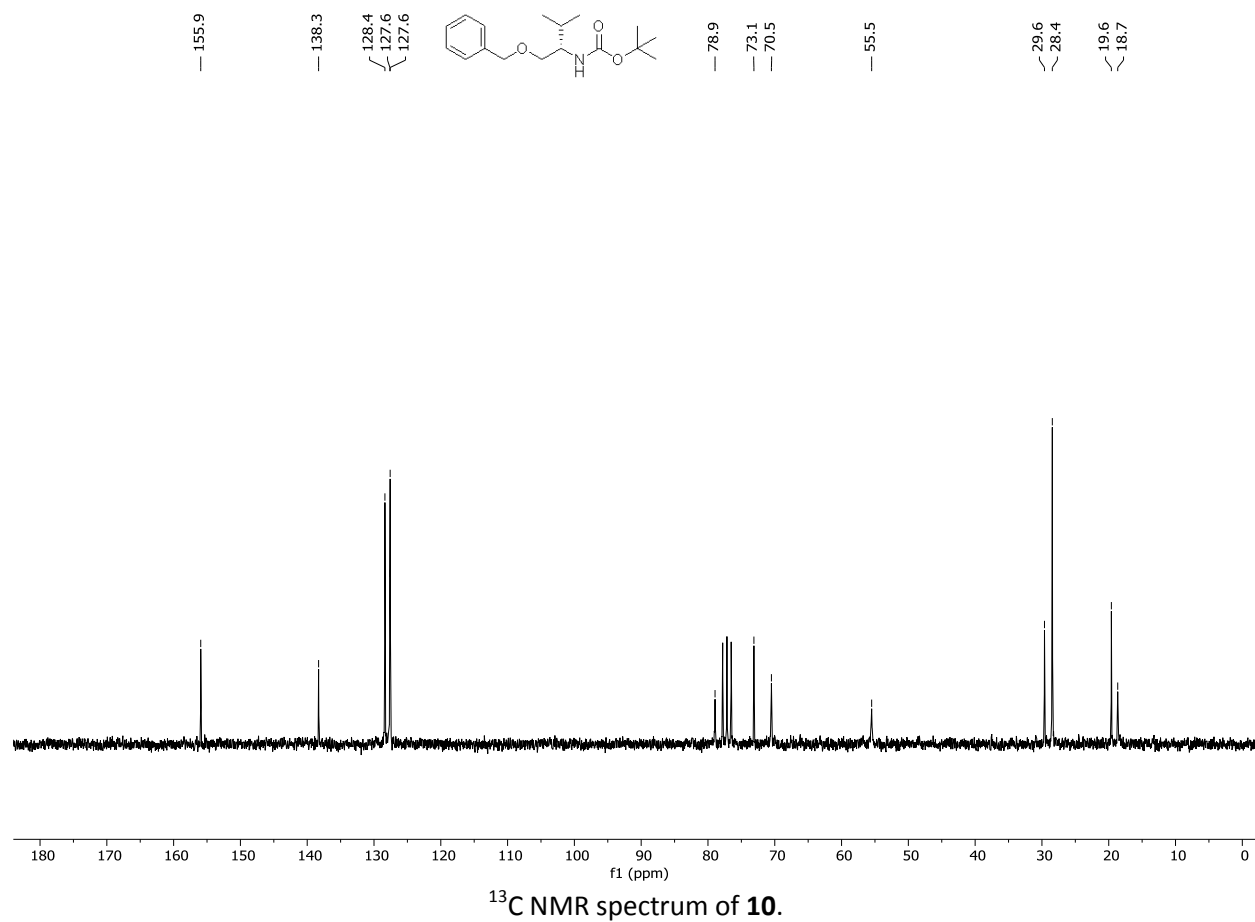

Supplement: s1 [file s1]
